1  
2  
3  
4  
5  
6  
7  
8  
9  
10  
11  
12  
13  
14  
15  
16  
17  
18  
19  
20  
21  
22  
23  
24  
25  
26  
27  
28  
29  
30

**Negative interplay between biofilm formation and competence  
in the environmental strains of *Bacillus subtilis***

Qianxuan She<sup>1,a</sup>, Evan Hunter<sup>1,a</sup>, Yuxuan Qin<sup>1</sup>, Samantha Nicolau<sup>1</sup>, Eliza A. Zalis<sup>1</sup>,  
Hongkai Wang<sup>2</sup>, Yun Chen<sup>2,b</sup>, and Yunrong Chai<sup>1,b</sup>

1. Department of Biology, Northeastern University, Boston, MA 02115
  2. Institute of Biotechnology, Zhejiang University, Hangzhou, China 310058
- a. These two authors contributed equally to this work.  
(She contributed to about 50% of the results in the initial submission and the revision; Hunter initiated the project and contributed to about 30% of the results in the initial submission.)
  - b. For correspondence, please address to [y.chai@northeastern.edu](mailto:y.chai@northeastern.edu); or [chenyun0927@zju.edu.cn](mailto:chenyun0927@zju.edu.cn).

Running title: Biofilm formation and competence

Key words: Biofilm, Competence, *Bacillus subtilis*, Cell differentiation,  
Environmental strains

31 **Abstract**

32 Environmental strains of the soil bacterium *Bacillus subtilis* have valuable  
33 applications in agriculture, industry, and biotechnology. They are capable of forming  
34 robust biofilms and demonstrate excellent biological control activities in plant  
35 protection. However, environmental strains are genetically less accessible, a sharp  
36 contrast to the laboratory strains well known for their natural competence and a  
37 limitation toward their application. In this study, we observed that robust biofilm  
38 formation of the environmental strains greatly reduces the rate of competent cells  
39 within the biofilm. By using the model strain 3610, we reveal a cross-pathway  
40 regulation that allows biofilm matrix producers and competence-developing cells to  
41 undergo mutually exclusive cell differentiation. We show that the competence  
42 activator ComK represses the key biofilm regulatory gene *sinI* by directly binding to  
43 the *sinI* promoter, thus blocking competent cells from simultaneously becoming  
44 matrix producers. In parallel, the biofilm activator SlrR represses competence  
45 through three distinct mechanisms, involving both genetic regulation and cell  
46 morphological changes. We discuss potential implications of limiting competence in  
47 a bacterial biofilm.

48

## 49 **Importance**

50           The soil bacterium *Bacillus subtilis* is capable of forming robust biofilms, a  
51 multicellular community important for its survival in the environment. *B. subtilis* also  
52 exhibits natural competence, the ability of cells to acquire genetic materials directly  
53 from the environment. By investigating competence development *in situ* during *B.*  
54 *subtilis* biofilm formation, we reveal that robust biofilm formation, an important  
55 feature of the environmental strains of *B. subtilis*, often greatly reduces the rate of  
56 competent cells within the biofilm. We characterize a cross-pathway regulation that  
57 allows cells associated with these two developmental events to undergo mutually  
58 exclusive cell differentiation during biofilm formation. Finally, we discuss potential  
59 biological implications of limiting competence in a bacterial biofilm.

## 60 Introduction

61 *Bacillus subtilis* is a soil-dwelling, spore-forming bacterium widely present in  
62 nature, and plays important roles in environment, agriculture, and industry. *B. subtilis*  
63 is also a plant growth-promoting rhizobacterium (PGPR), and a biological control  
64 agent that shows various beneficial activities in plant protection (1). Biological control  
65 by *B. subtilis* is attributed to a number of important abilities of the bacterium,  
66 including antibiotic production, inhibition of pathogenic fungi and parasites, induction  
67 of plant systemic resistance, and formation of plant root-associated biofilms (2-4).  
68 Biofilms are communities of microorganisms encased in a self-produced extracellular  
69 matrix, which provides protection to cells within the biofilm against various biotic and  
70 abiotic stresses (5-8). Undomesticated environmental strains of *B. subtilis* form  
71 robust biofilms in response to a variety of environmental and cellular signals (9-16).  
72 Some of those strains, such as NCIB3610 (hereafter abbreviated as 3610), become  
73 a model system to study bacterial biofilm formation (2, 14, 17-20).

74

75 In *B. subtilis*, biofilm formation is initiated by one or several histidine kinases  
76 (KinA-KinD) sensing environmental signals and activating a phosphorelay (Spo0F-  
77 Spo0B-Spo0A), which then activates Spo0A, a master regulator for sporulation and  
78 biofilm formation, via protein phosphorylation (Fig. 1)(21, 22). Phosphorylated Spo0A  
79 (Spo0A~P) activates *sinI*; the product SinI is an antagonist that counteracts a biofilm  
80 repressor SinR (23, 24). Another regulatory protein SlrR is also involved in  
81 antagonizing SinR (25). SlrR and SinR form a double negative regulatory switch (26).  
82 Under non-biofilm conditions, those matrix operons are repressed. Interestingly,  
83 domesticated strains of *B. subtilis* that have been applied in the laboratory research  
84 for multiple decades due to their feasibility in genetic manipulation, have lost their  
85 ability to form robust biofilms due to genetic mutations occurred during domestication  
86 (19, 20, 27).

87

88 Cell differentiation is another hallmark feature in bacterial biofilm formation. In  
89 *B. subtilis*, it is known that cells in the biofilm differentiate into phenotypically distinct  
90 cell types (2, 14, 28). Some of these cell types may overlap or become mutually  
91 exclusive. Previous studies showed that a subpopulation of cells progressed to  
92 become sessile matrix producers while cells in another subpopulation remained  
93 motile (26, 29). The two subsets of cells are mutually exclusive due to the control via

94 an epigenetic switch involving several regulatory genes including *sinI*, *sinR*, *slrR*, and  
95 *ymdB* (26, 30-32). The switch allows bifurcation of the population into SlrR<sup>ON</sup> and  
96 SlrR<sup>OFF</sup> cells, which correspond to sessile and motile cells due to SlrR-mediated  
97 gene regulation (26, 32). Some cells in the *B. subtilis* biofilm undergo sporulation  
98 (19). It was found that heat-resistant spores constitute 15-20% of the total cell  
99 population in a mature *B. subtilis* biofilm. It was proposed that in the matrix  
100 producers, Spo0A~P accumulates to intermediate levels to induce biofilm  
101 development (33). When Spo0A~P activities keeps rising, it eventually activates  
102 expression of hundreds of genes involved in sporulation (34, 35). This may explain  
103 how matrix producers transition to become sporulating cells and why sporulating  
104 cells, as a cell type, are inclusive to matrix producers. Competent cells are those  
105 capable of acquiring DNAs from the environment and are believed to be present in  
106 the *B. subtilis* biofilm as well (28). However, competence development has not been  
107 well studied *in situ* in a *B. subtilis* biofilm (36).

108

109 Natural competence is an ability of certain bacterial species, such as *B.*  
110 *subtilis*, to acquire environmental DNAs for genetic exchange (37, 38). Natural  
111 competence is evolutionarily important for the bacteria to increase genetic diversity  
112 and adaptability. In *B. subtilis*, the complex regulatory network controlling  
113 competence development has been elegantly elucidated (37-40). Competence is  
114 initiated when cells produce a quorum-sensing molecule, a peptide pheromone  
115 derived from ComX (Fig. 1)(41). This quorum-sensing peptide is sensed on the  
116 membrane by a sensory kinase ComP of the ComA-ComP two-component system  
117 (37). The response regulator ComA then activates a *srfAA-AD* operon, which not  
118 only encodes enzymes involved in biosynthesis of surfactin, but surprisingly also  
119 transcribes a small gene named *comS* (42). The protein ComS is critical in activating  
120 the competence activator ComK by helping release of ComK from a protein called  
121 MecA, an adaptor protein that normally routes ComK to be degraded (43, 44). Hence,  
122 the ComS-mediated release of ComK from MecA allows ComK to accumulate. In  
123 addition, the *comK* gene is subject to a bistable control mechanism; only a subset of  
124 cells accumulate high levels of this competence activator and enter the so-called K-  
125 state (39). Different from the well-studied laboratory strains, many environmental  
126 strains of *B. subtilis* are much less competent in general for still unclear reasons.  
127 This may limit the application of those environmental strains in industry and

128 agriculture. In the model strain 3610, a *comI* gene located in a cryptic plasmid was  
129 shown to inhibit the competence; deletion of *comI* or cure of the cryptic plasmid  
130 boosted transformation efficiency of 3610 by more than one hundred fold (45).  
131 Whether such a plasmid-born competence inhibitory gene is broadly present in  
132 environmental strains is not known. Another regulatory gene *degQ* was also shown  
133 to reduce competence in 3610; deletion of *degQ* similarly boosted transformation  
134 efficiency of 3610 (27). In addition, there was convincing evidence that a point  
135 mutation in the promoter of *degQ* in the laboratory strain 168, which likely lowers the  
136 expression of *degQ*, contributes to the much higher transformation efficiency of 168  
137 (27).

138

139 In this study, we aim to investigate factors that impact competence in the  
140 environmental strains of *B. subtilis*. We reveal an interplay between biofilm formation  
141 and competence development; robust biofilm formation in the environmental strains  
142 greatly reduces the rate of competent cells within the biofilm. We show that a very  
143 low number of cells express a late competence gene reporter and that those cells  
144 become mutually exclusive from matrix producers in the biofilm. We characterize a  
145 cross-pathway regulation that contributes to the above mutual exclusivity and limits  
146 competence in individual cells in the *B. subtilis* biofilm.

147

## 148 **Results**

### 149 ***B. subtilis* environmental strains are robust biofilm formers but poor in** 150 **competence.**

151 We previously investigated a number of environmental isolates of *B. subtilis*  
152 for their biological control activities in plant protection (4). Many of those strains form  
153 robust biofilms both under the laboratory setting (Fig. 2A) and on plant roots (4, 10).  
154 On the other hand, most of those environmental strains are much more difficult to  
155 manipulate genetically than the laboratory strains. They showed a much lower  
156 transformation efficiency, hundreds to tens of thousands fold lower than that of the  
157 laboratory strain 168 (Fig. 2B); some were not even transformable (data not shown).  
158 In those tested strains, big variations in transformation efficiency were also seen. For  
159 example, there was a several hundred-fold difference in transformation efficiency  
160 between 3610 and CY54, as judged by the percentage of transformants relative to  
161 the total number of cells (Fig. 2B). To test if variations in transformation efficiency

162 were due to altered competence gene regulation, we constructed a fluorescent  
163 reporter for a late-stage competence gene *comGA* ( $P_{comGA-gfp}$ ), and introduced the  
164 reporter into those environmental strains as well as the laboratory strain 168. The  
165 engineered reporter strains were grown in the competence medium (MC) to early  
166 stationary phase, and cells were examined under fluorescent microscopy.  $P_{comGA-gfp}$   
167 expressing cells were observed in only a small subset of cells in the population (with  
168 the exception of 168, Fig. 3A). A clear bimodal pattern in  $P_{comGA-gfp}$  expression was  
169 also seen, indicating that bistability in competence development reported previously  
170 in laboratory strains is also reinforced in environmental strains (39). The ratio of  
171  $P_{comGA-gfp}$  expressing cells in different environmental strains varied significantly and  
172 ranged from about 0.25% to 7.7%, much lower than in 168, the ratio in which was  
173 seen ~40% in our hand (Fig. 3B). In general, the results from assays of the  
174 fluorescent reporter correlated well with those from genetic transformation with the  
175 exception of CY54 (Figs. 2B and 3B), suggesting that the reduced transformation  
176 efficiency in environmental strains is likely due to genetic regulation. In summary,  
177 those environmental strains are robust biofilm formers but poor in competence.

178

### 179 **DegQ negatively impacts competence in some, but not all, tested** 180 **environmental strains.**

181 Previous studies suggested that the *degQ* gene negatively regulates genetic  
182 competence in *B. subtilis* (27). A deletion mutation in *degQ* increased the  
183 transformation efficiency of 3610 by a few fold while *degQ* overexpression led to a  
184 reduction in the transformation efficiency (Supple. Fig. 1A). DegQ is believed to  
185 impact competence through DegU, a response regulator and a transcription factor on  
186 the *comK* gene. A *degU* deletion mutation almost completely eliminated competence  
187 in 3610, while the deletion mutation of *degS*, which encodes the histidine kinase of  
188 the DegS-DegU two-component system (46), modestly impaired the transformation  
189 efficiency (Supple. Fig. 1A).

190

191 To test if DegQ plays a similar role in competence in the environmental strains,  
192 we introduced  $\Delta degQ$  into those strains and examined the transformation efficiency  
193 of the resulting mutants.  $\Delta degQ$  increased transformation efficiency in 5 out of the 7  
194 tested environmental strains (except for Ze90 and W13-3). The increase ranged from



195 ~2 to 88 fold when compared to the wild type strains (Supple. Fig. 1B). In Ze90 and  
196 W13-3,  $\Delta degQ$  decreased the transformation efficiency by ~4 and 7 fold, respectively  
197 (Supple. Fig. 1B). This result indicates that the impact of DegQ on competence  
198 varies in different environmental strains. We also wondered if the same or similar  
199 point mutation identified in the *degQ* promoter in the laboratory strain 168 is present  
200 in any of those environmental strains. We amplified the promoter region of the *degQ*  
201 gene by PCR and performed DNA sequencing. Our sequencing results show that the  
202 point mutation in *degQ* in 168 is not present in any of the environmental strains  
203 (highlighted in the blue square, Supple. Fig. 1C). However, additional mutations were  
204 identified in the promoter of *degQ* in CY35 and CY54 (single nucleotide changes at -  
205 28, -48, and -77 positions from the *degQ* transcription start, highlighted in red  
206 squares, Supple. Fig. 1C). Whether these newly identified mutations impact *degQ*  
207 expression and influence competence in CY54 and CY35 is yet to be tested.

208

### 209 **Matrix producers and competent cells are mutually exclusive in the *B. subtilis*** 210 **biofilm.**

211 To investigate why many environmental strains are poor in competence, we  
212 decided to examine competence development *in situ* during biofilm formation in the  
213 model strain 3610. A dual-labelled fluorescent reporter strain of 3610 ( $P_{tapA}$ -*mkate2*  
214 and  $P_{comGA}$ -*gfp*, EH43) was constructed, which allowed us to measure the  
215 expression of the matrix operon *tasA-sipW-tapA* ( $P_{tapA}$ -*mKate2*) and the activity of  
216 the late stage competence gene *comGA* ( $P_{comGA}$ -*gfp*) simultaneously in the same  
217 cells (47, 48). Cells from a 3-day pellicle biofilm by the reporter strain were collected  
218 and examined under fluorescent microscopy. Cells were seen in bundled chains and  
219 showed strong expression of the matrix reporter  $P_{tapA}$ -*mKate2* [chaining and matrix  
220 production are known to be coregulated during biofilm development, (32)](Fig. 4A  
221 and Supple. Fig. 2). In contrast, cells expressing  $P_{comGA}$ -*gfp* were very rare, always in  
222 singlets, and almost never overlapped with cells expressing  $P_{tapA}$ -*mKate2*. Since the  
223 number of cells expressing  $P_{comGA}$ -*gfp* was very low, flow cytometry was applied to  
224 quantitatively determine the ratio of cells expressing the two reporters in the pellicle  
225 biofilm. Cells were similarly collected, treated with mild sonication to disrupt the  
226 bundled chains, and applied to flow cytometry. As shown in Fig. 4B-C, only 0.08% of  
227 the total cells expressed  $P_{comGA}$ -*gfp* (Average results from three replicates were



228 shown in Fig. 4C). The reason why the ratio of  $P_{comGA-gfp}$  expressing cells was even  
229 lower in this assay than previously observed in Fig. 3B (~0.25% for 3610) is likely  
230 because the assay in Fig. 3 was done under competence favorite conditions (use of  
231 competence medium, cells collected at the early stationary phase, *etc*). More  
232 importantly, the results shown here (Fig. 4A-B and Supple. Fig. 2) strongly suggest  
233 that in the *B. subtilis* biofilm, matrix producers and competent cells rarely overlap;  
234 they are mutually exclusive cell types.

235

### 236 **Overexpression of the competence activator gene *comK* blocks biofilm** 237 **formation in *B. subtilis*.**

238 We hypothesized that the biofilm and the competence pathways may  
239 negatively cross-regulate each other and consequently these two cell types become  
240 mutually exclusive. To test our hypothesis, we first looked at the competence  
241 pathway. Since ComA-ComP is also important for biofilm formation (49), we focused  
242 on the competence activator ComK, which acts downstream of ComA-ComP in the  
243 pathway (Fig. 1)(44). To test if ComK negatively regulates the biofilm pathway, a  
244  $\Delta comK$  deletion mutant was constructed and the biofilm phenotype of the mutant  
245 examined. Surprisingly, the mutant did not show any noticeable biofilm phenotype  
246 compared to the wild type (Fig. 5A). Given the ultralow ratio of cells expressing  
247  $P_{comGA-gfp}$  (Fig. 4A) and the knowledge on ComK regulation, we reasoned that  
248 ComK was not active in the majority of cells, which could explain why  $\Delta comK$  and  
249 the wild type strain did not differ in the biofilm phenotype. We then tested *comK*  
250 overexpression. An IPTG-inducible copy of *comK* was constructed and introduced  
251 into 3610. This time, upon addition of IPTG, the engineered strain displayed a strong  
252 biofilm defect (Fig. 5A), similar to what was seen in the laboratory strain 168 (Fig.  
253 2A). This indicates that ComK strongly impacts biofilm development in *B. subtilis*.  
254 ComK activation is known to eventually cause growth arrest in *B. subtilis* (50). As an  
255 important control, the growth of the *comK* overexpression strain was examined.  
256 Upon induction of *comK* in the presence 10  $\mu$ M IPTG, no difference in the growth  
257 rate of the cells was found when compared to without *comK* induction (Supple. Fig.  
258 3A).

259

### 260 **ComK negatively regulates biofilm matrix genes.**

261 To further characterize the impact of ComK on biofilm formation, we tested if  
262 ComK regulates any of the matrix genes, such as the *epsA-O* and the *tapA* operons.  
263 A previously constructed transcription reporter  $P_{epsA-lacZ}$  was introduced into the  
264 *comK* overexpression strain (51). The resulting strain (YC160) was used to test the  
265 impact of *comK* overexpression on the activity of  $P_{epsA-lacZ}$ . As shown in Fig. 5B, the  
266 activity of  $P_{epsA-lacZ}$  decreased dramatically upon addition of 10  $\mu$ M IPTG to induce  
267 *comK*. In another test, we introduced the *comK* overexpression construct  
268 ( $thrC::P_{spank-comK}$ ) into the previously described dual fluorescent reporter strain  
269 ( $P_{tapA-mkate2}$  and  $P_{comGA-gfp}$ ). When the resulting strain (EH44) was grown in MSgg  
270 without addition of IPTG, about 50% of the cells were expressing  $P_{tapA-mkate2}$  (cells  
271 in red, Fig. 5E-F), and again a very low number of cells expressed  $P_{comGA-gfp}$  (cells  
272 in green, Fig. 5E-F). Upon addition of 50 or 100  $\mu$ M IPTG to induce *comK* expression  
273 for about an hour, the competence reporter  $P_{comGA-gfp}$  was found activated in a  
274 significantly increased subpopulation of cells (this time about 58% or 78% of the total  
275 cells were in green, middle and lower panels, respectively, Fig. 5E-F) while the  
276 expression of  $P_{tapA-mkate2}$  was turned off almost completely (cells in red, middle  
277 and lower panels, Fig. 5E-F). Importantly, matrix producers and competent cells  
278 again rarely overlapped in this assay. These results suggest that ComK negatively  
279 regulates biofilm matrix genes.

280

### 281 **ComK negatively regulates *sinI*.**

282 The *epsA-O* and the *tapA* operons are directly repressed by SinR while  
283 derepression occurs when SinI counteracts SinR through protein-protein interactions  
284 (23, 24, 52, 53). To determine how ComK negatively regulates the matrix operons,  
285 we tested if ComK regulates either *sinI* or *sinR*. We took a similar approach by  
286 applying previously constructed transcription reporters of  $P_{sinI-lacZ}$  and  $P_{sinR-lacZ}$   
287 (51). Each reporter was introduced into the *comK* overexpression strain, and the  
288 impact of *comK* overexpression on the activity of the reporters was similarly tested.  
289 Indeed, *comK* overexpression was found to have a strong negative impact on the  
290 activity of  $P_{sinI-lacZ}$ , but not on  $P_{sinR-lacZ}$  (Fig. 5C-D). These results indicate that  
291 ComK negatively regulates the matrix operons likely through its regulation on *sinI*.

292

### 293 **ComK directly binds to the regulatory region of *sinI*.**

294 ComK regulates genes through binding to the so-called K-box often found in  
295 the regulatory region of the genes (54). When the promoter sequence of *sinI* was  
296 analyzed, a region of DNA sequence that resembles the consensus K-box (“AAAA-  
297 N<sub>5</sub>-TTTT-N<sub>8</sub>-AAAA-N<sub>5</sub>-TTTT”) was recognized (Fig. 6A). This DNA sequence  
298 overlaps with both the -35 and -10 motives of the sigma A-dependent promoter and  
299 a Spo0A~P activation site (OA~P) in the *sinI* promoter (33). ComK binding to this  
300 putative K-box could prevent *sinI* transcription.

301

302 To test if the ComK protein binds to the promoter of *sinI*. An electronic mobility  
303 shift assay (EMSA) was performed. Recombinant His<sub>6</sub>-ComK proteins were  
304 expressed in *E. coli* and purified. Fluorescently end-labeled DNA probe containing  
305 about 300 bp of the *sinI* promoter was mixed with a gradient of His<sub>6</sub>-ComK proteins  
306 in the mobility shift assay. ComK was found to shift the DNA fragment, indicating a  
307 direct binding (upper panel, Fig. 6B). As a negative control, a similar size DNA probe  
308 containing the promoter of a *ganS* gene, not known to be regulated by ComK (54,  
309 55), was used in the same assay and little DNA shift was observed (lower panel, Fig.  
310 6B). Thus, the binding of ComK to the *sinI* promoter appeared to be specific. To  
311 further test if ComK recognizes the putative K-box in the *sinI* promoter, site-directed  
312 mutagenesis was performed on the box1 and box3 of the putative K-box as indicated  
313 (Fig. 6C, nucleotide changes highlighted in red). Mutagenesis on box2 and box4 was  
314 avoided due to their overlap with the -35 and -10 promoter motives (Fig. 6A). The  
315 reporter strains bearing P<sub>*sinI*</sub>-*lacZ* with sited directed mutations in the K-box were  
316 constructed and the activities of those strains tested. The results show that the point  
317 mutations in the box3 (mut2) and in both boxes 1 and 3 (mut1+2) had the most  
318 significant effect, resulting in increased *sinI* expression (Fig. 6D). To summarize, the  
319 competence pathway negatively cross-regulates the biofilm pathway likely through  
320 the competence activator ComK directly repressing the key biofilm regulatory gene  
321 *sinI*.

322

### 323 **Biofilm matrix negatively impacts competence in *B. subtilis*.**

324 We also predicted that the biofilm pathway negatively regulates competence  
325 development. A previous study showed that the extracellular biofilm matrix physically  
326 blocked cells from sensing the competence pheromones, which is essential for  
327 ComA-ComP-mediated activation of the *srfAA-AD* operon (49). The *srfAA-AD*

328 operon harbors the key competence gene *comS*, critical for activating ComK and  
329 inducing late competence genes in *B. subtilis* (42). Here, we further showed that  
330 deleting the biofilm matrix genes ( $\Delta epsH\Delta tasA$ ) indeed improved competence of *B.*  
331 *subtilis* 3610; the transformation efficiency of the matrix double mutant was ~7 fold  
332 higher than that of the wild type (Fig. 7A). This phenomenon was not only seen in  
333 3610, but also in some other environmental isolates of *B. subtilis*. When the *epsA-O*  
334 operon was deleted in those environmental isolates and the transformation efficiency  
335 of the mutants was compared to the respective wild type strains, an increase in  
336 transformation efficiency from about 2 to 100 folds was seen in 6 out of the 9 strains  
337 (Fig. 7B and Supple. Fig. 3B). This result indicates that it may be a general  
338 mechanism that the presence of extracellular matrix can reduce the competence of *B.*  
339 *subtilis* cells.

340

#### 341 **Extensive chaining in the biofilm negatively impacts competence.**

342 Cells in the *B. subtilis* biofilm form long bundled chains, important for building  
343 organized 3-dimensional structure of the biofilm (Fig. 4A)(19, 56). Interestingly, the  
344 DNA uptake machinery was shown to localize to the poles of the cells during *B.*  
345 *subtilis* competence development (57, 58). If true, one would predict that the  
346 nonmotile chained cells may encounter reduced efficiency in DNA uptake. To test  
347 the possible impact of chaining on competence, we first applied a  $\Delta sigD$  mutant.  
348 Sigma D (SigD) is responsible for the transcription of genes encoding multiple  
349 autolysins for cell separation, but not known to directly influence competence (59).  
350 The  $\Delta sigD$  mutant formed extensive long chains, consistent with the previous report  
351 (Supple. Fig. 4A)(59). Interestingly, when the transformation efficiency was  
352 compared between the wild type and the  $\Delta sigD$  mutant, the mutant showed  
353 drastically reduced efficiency even after taking into consideration of the impact of cell  
354 chains on CFU counting (see methods). The diminished competence in  $\Delta sigD$  was  
355 almost comparable to that of the  $\Delta comK$  mutant (Supple. Fig. 4B).

356

357 In the wild type biofilm, chaining is also controlled by the SinR/SlrR switch (26,  
358 30, 32, 56, 59). SlrR<sup>ON</sup> cells tend to form long chains of cells bundled together by the  
359 extracellular matrix due to matrix genes being activated while autolysin genes being  
360 simultaneously shut off (26). We decided to test if increasing SlrR production by

361 gene overexpression could have a similar negative impact on the transformation  
362 efficiency seen in  $\Delta sigD$ . A previously constructed  $\Delta slrR$  mutant containing an IPTG  
363 inducible copy of *slrR* was applied (56). Both the chaining phenotype and the  
364 transformation efficiency of the engineered cells were compared between no addition  
365 and with addition of IPTG. As shown in Figs. 8C-D, adding IPTG to the media  
366 significantly increased cell chaining even in shaking conditions while substantially  
367 reduced the transformation efficiency compared to no addition of IPTG. Our results  
368 thus suggest that extensive cell chaining during *B. subtilis* biofilm development likely  
369 plays a role in limiting competence of *B. subtilis* cells.

370

### 371 **SlrR negatively regulates the *srfAA-AD* operon.**

372 A previous study showed that the null mutation of *sinR* abolished competence  
373 but not clear how (60). Since the inhibition on competence by  $\Delta sinR$  was reported in  
374 a laboratory strain unable to form robust biofilms, overproduction of the matrix by the  
375  $\Delta sinR$  cells may not be the answer. Here we present evidence that SlrR, whose gene  
376 is repressed by SinR, negatively regulates *srfAA-AD* and thus competence (Fig. 1).  
377 We introduced a  $P_{srfAA}$ -*gfp* fluorescent reporter into the *slrR* mutant bearing an IPTG  
378 inducible copy of *slrR*. Upon addition of IPTG, *slrR* was induced, evidenced by the  
379 chaining phenotype and the activity of  $P_{srfAA}$ -*gfp* noticeably decreased compared to  
380 no addition of IPTG (Fig. 8E). Fluorescent pixel density in individual cells was  
381 quantified using ImageJ. In cells overexpressing *slrR*, the average pixel density was  
382 about half of that in cells not overexpressing *slrR* (11.5 vs 20.5, Fig. 8F). The  
383 repression of *srfAA-AD* by SlrR was also confirmed by real-time quantitative PCR  
384 using three different probes for the operon (Fig. 8G). Our genome-wide transcription  
385 profiling to characterize global SlrR regulon showed similar results (Chai,  
386 unpublished). Our results thus suggest that SlrR negatively regulates the *srfAA-AD*  
387 operon. In summary, we believe that SlrR, together with SinR, negatively regulates  
388 competence through three distinct mechanisms (Fig. 8H), by i) promoting matrix  
389 production to block competence signaling, and ii) forming extensive cell chains to  
390 possibly block DNA uptake, and iii) negatively regulating the *srfAA-AD* operon (and  
391 conceivably *comS*, Fig. 1).

392

393

## 394 Discussion

395 Environmental strains of *B. subtilis* have important applications in agriculture,  
396 industry, and biotechnology. However, different from well-studied laboratory strains,  
397 those environmental strains are genetically less accessible for still unclear reasons.  
398 This imposes limitation of their application in various fields. Environmental strains of  
399 *B. subtilis* are often capable of forming robust biofilms both under the laboratory  
400 settings and on plant roots, an ability important for them to establish intimate  
401 relationship with the plant in the rhizosphere. In this study, we uncovered that during  
402 biofilm formation by the *B. subtilis* model strain 3610, a very low number of cells  
403 differentiates into competent cells. Similar observations were also made in several  
404 environmental strains of *B. subtilis* (Fig. 3). We presented evidence that the low  
405 competence is contributed by the ability to form robust biofilms. The very low ratio of  
406 competent cells in the *B. subtilis* biofilm might be ecologically more relevant than  
407 what is often studied in test tubes with optimized competence media. The biological  
408 implication of greatly reduced competence associated with biofilm formation by wild  
409 *B. subtilis* strains is not very clear. One could argue that this is how natural  
410 competence in *B. subtilis* is expected to function in order to balance the ability of  
411 generating genetic variations and the potential risk of having too many individual  
412 cells in the population acquiring genetic variations.

413

414 Cell differentiation is a hall mark feature of bacterial biofilm formation. A  
415 number of studies have demonstrated co-existence of distinct cell types in the *B.*  
416 *subtilis* biofilm, and in a few cases have characterized molecular mechanisms of how  
417 specific cell types become mutually exclusive or inclusive (2, 14, 26, 28, 29). In this  
418 study, we showed that competent cells and matrix producers are mutually exclusive  
419 cells types during *B. subtilis* biofilm formation and provided mechanistic explanations  
420 of why they become mutually exclusive. Based on our evidence, we propose a  
421 working model on the cross-regulation between these two developmental pathways  
422 that contributes to their mutual exclusivity (Fig. 1). In one regulation, ComK in the K-  
423 state cells directly turns off expression of the key biofilm gene *sinI*. Since activity of  
424 *sinI* is indispensable for biofilm activation, direct repression of *sinI* by ComK allows  
425 K-state cells to shut down the biofilm pathway, and eliminate matrix production and  
426 cell chaining, which we showed negatively influence transformation efficiency. In the  
427 other regulation, the biofilm regulator SlrR plays a central role that allows SlrR<sup>ON</sup>



428 cells to avoid competence development. Not only matrix may physically block  
429 competence quorum-sensing, but cell chaining and negative regulation of the *srfAA-*  
430 *AD* operon (and *comS*) by SlrR further contribute to the shut-off of competence in  
431 SlrR<sup>ON</sup> cells. Similar regulations could also be present in the *B. subtilis*  
432 environmental strains. However, since we carried out our mechanistic studies  
433 primarily in the model strain 3610, further studies will be needed to test those  
434 regulations directly in the environmental strains of *B. subtilis*. In addition, the  
435 regulation in those environmental strains could differ from that in 3610, as some of  
436 our data already indicate so (e.g. Fig. 7B).

437

438         Previous studies have shown that competent cells are inclusive to cells  
439 responding to the competence pheromones and activating the surfactin biosynthesis  
440 operon, which very intriguingly also transcribes a small *comS* gene key to the  
441 competence development (42, 49). According to a previous study, under biofilm  
442 conditions in 3610, the genes involved in initiating competence (e.g. *comQ-comX-*  
443 *comP*) is expressed in a majority of the cells, while the surfactin operon is expressed  
444 in only about 10% of the total number of cells (defined as *srf*<sup>ON</sup>) in the population (49).  
445 This significant difference in the ratio is thought to be contributed in part by the  
446 paracrine signaling mechanism in that although the majority of cells produce the  
447 competence pheromone, only a handful of them respond to this quorum-sensing  
448 signal. Further, another peptide pheromone CSF is also involved by regulating the  
449 response regulator ComA through a feedback mechanism (61). It can be speculated  
450 that in those 10% *srf*<sup>ON</sup> cells, ComK is activated above a critical threshold in a further  
451 reduced ratio of the cells, due to the well-studied complex regulation on ComK and  
452 the *comK* gene. Those ComK<sup>ON</sup> cells enter the so-called K-state and ultimately  
453 become competent for environmental DNA acquisition. It is a bit surprising to us that  
454 the ComK<sup>ON</sup> cells (presumably cells expressing P<sub>*comGA*</sub>-*gfp*) is less than 0.1%, versus  
455 10% of *srf*<sup>ON</sup> cells. This implies that at best only about 1 out of 100 cells enter the K-  
456 state even after all the cells initiate the competence by inducing the *srfAA-AD* operon  
457 and *comS*. Again, it could be evolutionarily important to limit competence capacity  
458 when *B. subtilis* cells live in multicellular communities in the natural environment.

459

460

461



## 462 **Materials and Methods**

463 **Strains and media.** Strains used in this study are listed in Table 1. *B. subtilis* strains  
464 PY79, 168, NCIB3610, their derivatives, and environmental isolates of *B. subtilis*  
465 were cultured in lysogeny broth at 37°C. Pellicle biofilm formation in *B. subtilis* was  
466 induced using MSgg broth (50 mM potassium phosphate and 100 mM MOPS at pH  
467 7.0 supplemented with 2 mM MgCl<sub>2</sub>, 700 µM CaCl<sub>2</sub>, 50 µM MnCl<sub>2</sub>, 50 µM FeCl<sub>3</sub>, 1  
468 µM ZnCl<sub>2</sub>, 2 µM thiamine, 0.5% glycerol, and 0.5% glutamate) at 30°C. Colony  
469 biofilm formation of *B. subtilis* was induced using MSgg solidified with 1.5% (w/v)  
470 agar at 30°C. When growing the chromosomal *thrC* integration strains of *B. subtilis*,  
471 additional 300 µg ml<sup>-1</sup> threonine was added. Enzymes used in this study were  
472 purchased from New England Biolabs (MA, USA). Chemicals and reagents were  
473 purchased from Sigma or Fisher Scientific (MA, USA). Oligonucleotides were  
474 purchased from Eurofins Genomics (PA, USA) and DNA sequencing was also  
475 performed at Eurofins Genomics. Antibiotics, if needed, were applied at the following  
476 concentrations: 5 µg ml<sup>-1</sup> of tetracycline, 1 µg ml<sup>-1</sup> of erythromycin, 100 µg ml<sup>-1</sup> of  
477 spectinomycin, 10 µg ml<sup>-1</sup> of kanamycin, and 5 µg ml<sup>-1</sup> of chloramphenicol for  
478 transformation in *B. subtilis* and 100 µg ml<sup>-1</sup> of ampicillin and 50 µg ml<sup>-1</sup> of kanamycin  
479 for *E. coli* DH5α and BL21/DE3 strains.

480

481 **Strain construction and DNA manipulation.** General methods for molecular  
482 cloning followed the published protocols (62). Restriction enzymes (New England  
483 Biolabs) were used according to the manufacturer's instructions. Transformation of  
484 plasmid DNA into *B. subtilis* strains was performed as described previously (63).  
485 SPP1 phage-mediated general transduction was also used to transfer antibiotic-  
486 marked DNA fragments among different strains (64). Plasmids used in this study are  
487 listed in Table 1 and oligonucleotides are listed in Table 2.

488 To generate the competence gene reporter strains (*P<sub>comGA</sub>-gfp*), the promoter  
489 of *comGA* was amplified via PCR using 3610 genomic DNA as the template and  
490 primers PcomGA-F1 and PcomGA-R1. The PCR product was cloned into the EcoRI  
491 and HindIII sites of pYC121 aiming for the integration into the *amyE* locus of 3610  
492 and other environmental isolates of *B. subtilis*. The recombinant plasmid was  
493 transformed into DH5α for amplification. The recombinant plasmid extracted from  
494 transformed DH5α was subsequently transformed into PY79 and then to 3610.

495 To generate *comK* insertional deletion mutation in 3610 (YC100), the lysate  
496 containing  $\Delta comK::kan$  was made from RL2262 (a gift from Rich Losick, Harvard  
497 University) and introduced into 3610 by transduction. To create an IPTG-inducible  
498 copy of *comK* for integration at the *amyE* locus, the *comK* coding sequence was  
499 amplified by PCR using primers comK-F1 (HindIII) and comK-R1 (NheI). The PCR  
500 product was digested and cloned into the HindIII and NheI sites of pDR111 (65) to  
501 make an IPTG inducible  $P_{spank^-}comK$  fusion, generating a recombinant plasmid  
502 pYC119. The pYC119 plasmid was then used for integration of  $P_{spank^-}comK$  into the  
503 *amyE* locus of 3610. To do so, the plasmid was first introduced into PY79 by  
504 transformation and then into 3610 by SPP1 phage mediated transduction. To create  
505 a second version of an IPTG-inducible *comK* for integration at the *thrC* locus of 3610,  
506 a DNA fragment containing the  $P_{spank}$  promoter was cut from the above pYC119 with  
507 EcoRI and HindIII double digestion, and a second DNA fragment containing the  
508 *comK* coding sequence and the *lacI* gene was cut separately from pYC119 by HindIII  
509 and BamHI double digestion. These two DNA fragments were cloned into the EcoRI  
510 and BamHI sites of pDG1664 by three-way ligation to generate an IPTG-inducible  
511  $P_{spank^-}comK$  in the *thrC* integration plasmid, resulting in pYC128. The pYC128  
512 plasmid was introduced into PY79 by transformation. To generate three reporter  
513 strains of YC159 ( $P_{sinI^-}lacZ$ ), YC160 ( $P_{epsA^-}lacZ$ ), and YC177 ( $P_{sinR^-}lacZ$ ), each with  
514 an inducible copy of *comK* at the *thrC* locus, the lysate containing *thrC::P<sub>spank^-</sub>*  
515 *comK::mIs* was prepared from the above recombinant pY79 strain, and introduced  
516 into YC108 ( $P_{sinR^-}lacZ$ ), YC110 ( $P_{sinI^-}lacZ$ ), and YC130 ( $P_{epsA^-}lacZ$ ), respectively, by  
517 SPP1 phage mediated transduction.

518 To generate the recombinant plasmid pQS06 for His<sub>6</sub>-ComK overexpression  
519 and purification, the *comK* coding gene was amplified by PCR using 3610 genomic  
520 DNA as the template and primers PcomK-F1 and PcomK-R1. The PCR product was  
521 cloned into the pET28a vector between the restriction sites NdeI and HindIII to  
522 create the PT7-his6-*comK* fusion. The recombinant plasmid pQS06 was prepared  
523 from *E. coli* DH5 $\alpha$  and then introduced into *E. coli* BL21/DE3 by chemical  
524 transformation. The resulting *E. coli* strain QS16 was used for His6-ComK  
525 overexpression and purification. To create the strain YC1270, the lysate containing  
526 *amyE::P<sub>hyperspank^-</sub>slrR* was prepared from YC672 and introduced into DL744, which  
527 bears the reporter *lacA::P<sub>srfAA^-</sub>gfp::mIs*, by transduction (49, 56). To create the

528 transcription reporter fusion of  $P_{comGA-gfp}$ , the promoter sequence of the *comGA*  
529 gene was amplified by PCR using 3610 genomic DNA as the template and primers  
530 PcomGA-F1 and PcomGA-R1. The PCR product was cloned into the pYC121  
531 plasmid between the restriction sites EcoRI and HindIII to create the  $P_{comGA-gfp}$   
532 fusion. The recombinant plasmid was transformed into DH5 $\alpha$  for amplification. The  
533 recombinant plasmid extracted from transformed DH5 $\alpha$  was subsequently  
534 transformed into PY79 and then to 3610.

535

536 **Colony and pellicle biofilm development.** For colony biofilm formation, cells were  
537 grown to exponential phase in LB broth and 2  $\mu$ L of the culture was spotted onto  
538 MSgg media solidified with 1.5% (w/v) agar. The plates were incubated at 30°C for 3  
539 days. For pellicle biofilm formation, cells were grown to exponential phase in LB  
540 broth, and 3  $\mu$ L of the culture was inoculated into 3 mL of MSgg liquid media in a 6-  
541 well or 12-well microtiter plate (VWR). The plates were incubated at 30°C for 2-3  
542 days. Images of colony and pellicle biofilms were taken using a Nikon Coolpix  
543 camera or a Leica MSV269 dissecting scope.

544

545 **Site-directed mutagenesis.** Site-directed mutagenesis of the *sinI* regulatory  
546 sequence was performed by using 6 different primers to change the nucleotides in  
547 the putative ComK binding boxes in the *sinI* promoter region. In the  $P_{sinI}^{Mut1}$   
548 construction (box 1), PsinI-F4 and PsinI<sup>Mut1</sup>-R were used to amplify the fragment 1.  
549 PsinI-R4 and PsinI<sup>Mut1</sup>-F were used for the amplification of fragment 2. The  
550 fragments 1 and 2 were subsequently used in the second round of overlapping PCR  
551 to generate the full-length DNA fragment containing the *sinI* promoter with  
552 designated point mutations. Overlapping PCR product was purified using PCR  
553 purification kit (Qiagen) and subsequently digested using EcoRI and HindIII. The  
554 plasmid pDG268 was digested simultaneously using EcoRI and HindIII. Both  
555 digestion products were gel-purified, ligated using T4 Ligase, and transformed *E. coli*  
556 DH5 $\alpha$ . The recombinant plasmid was purified from *E. coli* DH5 $\alpha$  and transformed  
557 into PY79. The *amyE* homologous region containing mutated  $P_{sinI}^{Mut1}$  and the  
558 chloramphenicol resistance marker was integrated onto PY79 chromosome via  
559 double crossover homologous recombination. The genomic DNA of the resulting  
560 transformant was prepared and subsequently transformed into 3610. Site-directed

561 mutagenesis on  $P_{sinI}^{Mut2}$  (box3) was performed similarly except that the primers  
562  $P_{sinI}Mut2-F$ ,  $P_{sinI}Mut2-R$ ,  $P_{sinI}-F4$  and  $P_{sinI}-R4$  were used. Construction of  
563  $P_{sinI}^{Mut1+2}$  was performed by using the recombinant plasmid containing  $P_{sinI}^{Mut1}$  as the  
564 template during the first round of PCR amplification and primers  $P_{sinI}Mut2-F$ ,  
565  $P_{sinI}Mut2-R$ ,  $P_{sinI}-F4$  and  $P_{sinI}-R4$ . Designated point mutations in the *sinI* promoter  
566 on the recombinant plasmids were verified by DNA sequencing before being  
567 introduced into *B. subtilis*.

568

569 **Assays of transformation efficiency.** Assays on transformation efficiency were  
570 performed by introducing *B. subtilis* genomic DNAs containing specific antibiotic  
571 resistance genes as a selection marker into indicated strains. Specifically, the three  
572 plasmids pDG1662 (*amyE::chl<sup>R</sup>*), pDG1663 (*thrC::mIs<sup>R</sup>*), and pDG1730  
573 (*amyE::spec<sup>R</sup>*) containing different antibiotic markers flanked by the either *B. subtilis*  
574 *amyE* or *thrC* sequences (26), were introduced into 3610 first for double crossover  
575 recombination on the chromosome. The genomic DNA bearing either *amyE::chl<sup>R</sup>*, or  
576 *amyE::chl<sup>R</sup>*, or *thrC::mIs<sup>R</sup>* was prepared from the above strains. The concentration of  
577 the prepared genomic DNAs was determined using Nanodrop (Thermo Fisher). For  
578 each transformation event, a fresh single colony of the strain was picked and grown  
579 in LB broth to log phase. The log phase culture was then 1:100 subcultured into 2  
580 mL competence medium (MC) supplemented with 3 mM MgSO<sub>4</sub>. Cells were grown  
581 at 37 °C in shaking until early stationary phase (OD<sub>600</sub>=1.5), 10 µg of the genomic  
582 DNA was then mixed with 500 µL competent cells, and cells were incubated for  
583 another hour before harvest. Samples were plated on the LB plates with the addition  
584 of either 100 µg/mL of spectinomycin (for *spec<sup>R</sup>* selection) or 5 µg/mL of  
585 chloramphenicol (for *chl<sup>R</sup>* selection) or 25 µg/mL of lincomycin+1 µg/mL of  
586 erythromycin (for *mIs<sup>R</sup>* selection). Next day, CFU on the transformation plates was  
587 counted. The total number of cells was calculated by measuring the O.D.<sub>600</sub> of the  
588 culture prior to plating and assuming 3 x 10<sup>8</sup> cells for OD<sub>600</sub>=1.0 of the culture (which  
589 was experimentally determined for 3610, data not shown) across all *B. subtilis*  
590 cultures used in the transformation assays unless for the strains involving extensive  
591 cell chains (see below). Each assay was done at least three times.

592 For transformation of the *slrR* inducible strain (YC672), cells were grown in LB  
593 broth to log phase, diluted 1:100 into MSgg broth, and grown to mid log phase

594 (OD<sub>600</sub>=0.5) again. Cells were then split into two fractions, one added with 100 μM  
595 IPTG to induce *slrR* overexpression and the other no addition of IPTG. Both cultures  
596 were continued to grow for another hour for *slrR* induction. 10 μg of genomic DNA  
597 was then added to each culture of 500 μL followed by one more hour growth at 37°C  
598 with shaking. Before harvest, the cultures were mildly sonicated (scale 1.5 output, 50%  
599 interval, 3-5 pulses on ice) using the sonicator (Sciencz). After sonication, cells were  
600 analyzed under light microbiology to verify the disruption of chaining. Cells were then  
601 the plated on LB plates supplemented with appropriate antibiotics. Next day, the  
602 number of transformants on the plates were calculated. For counting the total  
603 number of cells, cultures were serial-diluted and plated on regular LB plates. CFU  
604 was counted next day. All assays were done at least three times with biological  
605 replicates. The transformation experiment using the *sigD* mutant followed the similar  
606 protocol to eliminate the impact of chaining.

607  
608 **Expression and purification of recombinant ComK proteins.** BL21/DE3 cells  
609 harboring the recombinant plasmid (PT7-his6-*comK*) were grown in LB broth  
610 supplemented with 50 μg/mL kanamycin at 37°C overnight in shaking. The overnight  
611 culture was aliquoted at 1:500 to 300 mL LB media supplemented with 50 μg/mL  
612 kanamycin in shaking condition at 30 °C. 1 mM IPTG was added when OD<sub>600</sub> of  
613 culture reached 0.5. IPTG induction was allowed to continue for two hours before  
614 harvesting the culture. The culture was harvested and centrifuged at 4500 rpm at 4 °C  
615 for 30 minutes. The cell pellet was resuspended and washed twice using cold  
616 phosphate buffer solution. The supernatant was discarded, and the cell pellets were  
617 again resuspended using 10 mL lysis buffer (20 mM Tris-HCl, 300 mM NaCl, 1 mM  
618 PMSF, pH 8.5). The cell resuspension was lysed using sonication on ice. The total  
619 cell lysate was centrifuged at 5000 rpm at 4 °C for 30 minutes. The cleared lysate  
620 containing soluble His6-ComK was transferred into a new precooled tube. Cell  
621 lysate was mixed with 1 mL of Ni-NTA agarose beads (Qiagen), and the mixture was  
622 rotated at 4 °C for 2 hours. The mixture of lysate and beads was transferred into the  
623 column and washed for five times with wash buffer (20 mM Tris-HCl, 300 mM NaCl,  
624 25 mM imidazole, pH 8.5). 2 mL wash buffer was applied in each wash. The flow-  
625 through was also collected in 5 separate tubes. The column was eluded five times  
626 using elution buffer (20 mM Tris-HCl, 300 mM NaCl, 250 mM imidazole, pH 8.5).



627 500  $\mu$ L of elution buffer was applied to the column each time and the elute was  
628 collected in the tubes separately. 12% SDS-PAGE was applied to size-fractionate  
629 the proteins and verify the purity and abundance of the recombinant His6-ComK  
630 proteins. The purified protein fractions were pooled and dialyzed in a dialysis buffer  
631 (20 mM sodium phosphate, 300 mM NaCl, 0.3 mM DTT, 10% glycerol, pH 7.4)  
632 overnight. The final concentration of the protein was determined using Bradford  
633 protein assays. The proteins were stored at -80  $^{\circ}$ C.

634

635 **Electrophoretic mobility shift assays (EMSA).** An about 300-bp DNA fragment  
636 containing the promoter of *sinI* ( $P_{sinI}$ ) was used as the DNA probe for the binding of  
637 recombinant ComK proteins in EMSA, and a similar size DNA fragment containing  
638 the promoter of *ganS* ( $P_{ganS}$ ) was used as a negative control DNA probe. The  
639 fluorescent DNA probes were generated by PCR using 3610 genomic DNA as the  
640 template, and with the forward primers  $P_{sinI}$ -F and  $P_{ganS}$ -F covalently linked to 5'Cy3  
641 fluorescent dye, and the regular reverse primers  $P_{sinI}$ -R and  $P_{ganS}$ -R. The PCR  
642 product was gel purified, eluted in ddH<sub>2</sub>O and the quality was measured by  
643 NanoDrop (Fisher Thermo Scientific). A gradient of protein concentrations was  
644 applied in the reaction mixtures. A decreasing gradient of 150, 60, 15, and 7.5 nM of  
645 the recombinant His<sub>6</sub>-ComK was applied in each binding mixture. 200 pmol of  
646 fluorescent labelled DNA probe was applied in each lane. The protein-DNA binding  
647 reaction was incubated in 20  $\mu$ L reaction volume, containing 10 mM Tris-HCl, 10 mM  
648 HEPES, 50 mM KCl, 1 mM EDTA, 10  $\mu$ g/mL BSA, and 4% sucrose. To reduce non-  
649 specific binding, 500 ng of random DNA (poly dl:dC) was added to each binding  
650 reaction. The reaction was incubated on ice for 30 min. The gel was run in 0.5X TBE  
651 buffer at 65 V for 3.5 h at 4 $^{\circ}$ C. The resulting gel was imaged using ChemiDoc MP  
652 (Bio-Rad, USA).

653

654 **Assays of  $\beta$ -galactosidase activity.** Cells were cultured in MSgg medium at 30 $^{\circ}$ C  
655 with shaking. When indicated, IPTG was added to the media at the beginning at a  
656 final concentration of 10  $\mu$ M. One milliliter of culture was collected at each indicated  
657 time point and cells were centrifuged down at 5,000 rpm for 10 min. Cell pellets were  
658 suspended in 1 ml Z buffer (40 mM NaH<sub>2</sub>PO<sub>4</sub>, 60 mM Na<sub>2</sub>HPO<sub>4</sub>, 1 mM MgSO<sub>4</sub>, 10  
659 mM KCl, and 38 mM  $\beta$ -mercaptoethanol) supplemented with 200  $\mu$ g ml<sup>-1</sup> lysozyme.

660 Resuspensions were incubated at 37°C for 15 min. Reactions were started by adding  
661 200 µl of 4 mg ml<sup>-1</sup> ONPG (2-nitrophenyl-β-D-galactopyranoside) and stopped by  
662 adding 500 µL of 1 M Na<sub>2</sub>CO<sub>3</sub>. Samples were then briefly centrifuged down at 5,000  
663 rpm for 1 min. The soluble fractions were transferred to cuvettes (VWR), and  
664 absorbance of the samples at 420 nm was recorded using a Bio-Rad  
665 Spectrophotometer. The β-galactosidase specific activity was calculated according to  
666 the equation (Abs<sub>420</sub>/time×OD<sub>600</sub>) × dilution factor × 1000. Assays were conducted in  
667 triplicate.

668

669 **Cell membrane staining.** For cell membrane staining, cells were grown to log  
670 phase and harvested. Cell pellets were washed with PBS buffer twice, resuspended  
671 in 100 µL PBS buffer, and mixed with 1 µL of FM 4-64 dye (Life Technologies) for 5  
672 min on ice with gentle tapping of the tube. 2 µL of the resuspension was placed on a  
673 1% (w/v) agarose pad and covered with a cover slip. For observation of the FM 4-64  
674 fluorescence dye, the the excitation wavelength was set at 540-580 nm and the  
675 emission wavelength at 610-680 nm. Cells from three independent biological  
676 replicates were imaged using a Leica DFC3000 G camera on a Leica AF6000  
677 microscope.

678

679 **Real time quantitative PCR (qPCR).** Cells were collected after the overexpression  
680 of SlrR in experimental group. Total RNAs were extracted by using TRIzol  
681 (Invitrogen) following the manufacturer's protocol. Isolated RNAs were reverse  
682 transcribed into single-stranded complementary DNA (cDNA) using a High Capacity  
683 cDNA Reverse Transcription Kit (Applied Biosystems). RT-qPCR was performed by  
684 using Fast SYBR<sup>TM</sup> Green Master Mix (Applied Biosystems) with Step One Plus  
685 Real-Time PCR system (Applied Biosystems). The 16S rRNA gene was used as an  
686 internal reference. The relative expression of specific genes was calculated by using  
687 the 2<sup>-ΔΔCT</sup> method. The statistically analysis was performed using t-test.

688

689 **Cell fluorescence imaging and pixel quantification.** For imaging of the  
690 environmental strains bearing the *P<sub>comGA</sub>-gfp* fluorescent reporter, the reporter strains  
691 were grown in LB broth to log phase. Each log phase culture was then 1:100  
692 subcultured into 2 mL competence medium (MC) supplemented with 3 mM MgSO<sub>4</sub>.



693 Cells were grown at 37 °C in shaking until early stationary phase ( $OD_{600}=1.5$ ). Cells  
694 were then spun down, washed with PBS buffer once, and resuspended in 100  $\mu$ L of  
695 PBS buffer. 2  $\mu$ L of the resuspension was placed on a 1% (w/v) agarose pad,  
696 covered with a cover slip, and observed under fluorescent microscopy. Imaging of  
697 different samples was conducted using the same exposure settings.

698 To quantify the ratio of  $P_{comGA-gfp}$  expressing cells relative to the total number  
699 of cells, fluorescence of single cells was quantified in 3 different images comprising  
700 of a total of 600-800 cells per sample, using the MicrobeJ plugin for ImageJ (66, 67).  
701 These 3 images were randomly selected from more than half-dozen separate  
702 images obtained in two experimental repeats. Using the “Analyze Particles”  
703 command, the size cutoff of 100 pixel<sup>2</sup> was set to exclude the noise from the viable  
704 cells. Using the “Threshold” command, the threshold number was adjusted to  
705 highlight and select the pixel area of interest, which indicates the viable cells, for the  
706 analysis. A threshold above three times of the average background pixel density was  
707 used to define  $P_{comGA-gfp}$  expressing cells. The total number of cells were counted in  
708 phase images while the fluorescent cells were counted with the corresponding  
709 fluorescent channel images and verified in combination with manual examination.

710 For imaging of the *slrR* inducible strain (YC1270), cells were grown in LB  
711 broth to log phase. Cells were then diluted 1:100 to MSgg broth and grown to mid log  
712 phase ( $OD_{600}=0.5$ ). Cells were then split into two fractions, one added with 100  $\mu$ M  
713 IPTG and the other no addition of IPTG. Both fractions were continued to grow for  
714 another hour. Cells were then spun down, washed with PBS buffer once, and  
715 resuspended in 100  $\mu$ L of PBS buffer. 2  $\mu$ L of the resuspension was placed on a 1%  
716 (w/v) agarose pad, covered with a cover slip, and observed under fluorescent  
717 microscopy. Non-specific background fluorescence was determined by quantifying  
718 WT cells bearing no fluorescent reporter. Imaging of different samples was  
719 conducted using the same exposure settings. Pixel density of single-cell  
720 fluorescence was quantified on >200 cells per sample using the MicrobeJ plugin for  
721 ImageJ.

722

723 **Flow cytometry.** Flow cytometry was carried out using a BD FACSAria II with a 70  
724 micron nozzle. Briefly, biofilms were grown for 48 hours in defined monosodium  
725 glutamate-glycerol (MSgg) biofilm promoting-media. After 48 hours of growth, cells

726 were harvested from pellicle biofilms, cell chains were disrupted by mild sonication,  
727 and 5  $\mu$ L of resuspended cells were diluted in 1 mL PBS through a 35  $\mu$ m filter  
728 (Corning Falcon tube, Thermo Fisher). FACS DIVA software was used to collect  
729 100,000 events for each sample. Data were analyzed in FlowJo software. Gates  
730 were drawn, based on the size, to exclude the bulky events, which were considered  
731 as clumps or cell chains. This size bias was confirmed by plotting these events on  
732 FSC/SSC axis. The rest of the gated cells was considered to be single cells and  
733 were displayed in GFP-A/mKate-A axis. Four strains, 3610 as a gating control for  
734 fluorescent signals, two single reporter strains, ( $P_{comGA}$ -*gfp* and  $P_{tapA}$ -*mkate2*), and  
735 the dual reporter strain ( $P_{comGA}$ -*gfp*/ $P_{tapA}$ -*mkate2*), were applied in the analyses by  
736 flow cytometry. Assays were performed in three biological replicates.

737

738

### 739 **Acknowledgments**

740 This work was supported by the US National Science Foundation (MCB1651732 to Y.  
741 Chai), and by the National Natural Science Foundation of China (31922074),  
742 National Key Research and Development Program of China (2017YFD0201104),  
743 and the Young Elite Scientist Sponsorship Program (2017QNRC001) to Y. Chen.

744

### 745 **Conflict of interests**

746 The authors declared that there is no conflict of interests.

## 747 References

- 748 1. Emmert EAB, Handelsman J. 1999. Biocontrol of plant disease: a (Gram-) positive  
749 perspective. *FEMS Microbiol Lett* 171:1-9.
- 750 2. Vlamakis H, Chai Y, Beauregard P, Losick R, Kolter R. 2013. Sticking together:  
751 building a biofilm the *Bacillus subtilis* way. *Nat Rev Micro* 11:157-168.
- 752 3. Bais HP, Fall R, Vivanco JM. 2004. Biocontrol of *Bacillus subtilis* against infection of  
753 *Arabidopsis* roots by *Pseudomonas syringae* is facilitated by biofilm formation and  
754 surfactin production. *Plant Physiol* 134:307-319.
- 755 4. Chen Y, Yan F, Chai Y, Liu H, Kolter R, Losick R, Guo J-h. 2013. Biocontrol of  
756 tomato wilt disease by *Bacillus subtilis* isolates from natural environments depends  
757 on conserved genes mediating biofilm formation. *Environ Microbiol* 15:848-864.
- 758 5. Davey ME, O'toole GA. 2000. Microbial biofilms: from ecology to molecular genetics.  
759 *Microbiol Mol Biol Rev* 64:847-867.
- 760 6. Kolter R, Greenberg EP. 2006. Microbial sciences: The superficial life of microbes.  
761 *Nature* 441:300-302.
- 762 7. O'Toole G, Kaplan HB. 2000. Biofilm formation as microbial development *Annu Rev*  
763 *Microbiol* 54:49-80.
- 764 8. Stoodley P, Sauer K, Davies DG, Costerton JW. 2002. Biofilms as complex  
765 differentiated communities. *Annu Rev Microbiol* 56:187-209.
- 766 9. López D, Kolter R. 2010. Extracellular signals that define distinct and coexisting cell  
767 fates in *Bacillus subtilis*. *FEMS Microbiology Reviews* 34:134-149.
- 768 10. Chen Y, Cao S, Chai Y, Clardy J, Kolter R, Guo J-h, Losick R. 2012. A *Bacillus*  
769 *subtilis* sensor kinase involved in triggering biofilm formation on the roots of tomato  
770 plants. *Mol Microbiol* 85:418-430.
- 771 11. Beauregard PB, Chai Y, Vlamakis H, Losick R, Kolter R. 2013. *Bacillus subtilis*  
772 biofilm induction by plant polysaccharides. *Proc Nat Acad Sci USA* 110:E1621-E1630.
- 773 12. Chen Y, Gozzi K, Yan F, Chai Y. 2015. Acetic acid acts as a volatile signal to  
774 stimulate bacterial biofilm formation. *mBio* 6:e00392-15.
- 775 13. Stanley NR, Britton RA, Grossman AD, Lazazzera BA. 2003. Identification of  
776 Catabolite Repression as a Physiological Regulator of Biofilm Formation by *Bacillus*  
777 *subtilis* by Use of DNA Microarrays. *J Bacteriol* 185:1951-1957.
- 778 14. Shank EA, Kolter R. 2011. Extracellular signaling and multicellularity in *Bacillus*  
779 *subtilis*. *Current Opinion in Microbiology* 14:741-747.
- 780 15. Greenwich J, Reverdy A, Gozzi K, Di Cecco G, Tashjian T, Godoy-Carter V, Chai Y.  
781 2019. Decreasing Serine Levels During Growth Transition Triggers Biofilm Formation  
782 in *Bacillus subtilis*. *J Bacteriol* 10:1128.
- 783 16. Subramaniam AR, DeLoughery A, Bradshaw N, Chen Y, O'Shea E, Losick R, Chai Y.  
784 2013. A serine sensor for multicellularity in a bacterium. *eLife* 2.
- 785 17. Lemon KP, Earl AM, Vlamakis HC, Aguilar C, Kolter R. 2008. Biofilm development

- 786 with an emphasis on *Bacillus subtilis*. *Curr Top Microbiol Immunol* 322:1-16.
- 787 18. Cairns LS, Hobley L, Stanley-Wall NR. 2014. Biofilm formation by *Bacillus subtilis*:  
788 new insights into regulatory strategies and assembly mechanisms. *Mol Microbiol*  
789 93:587-98.
- 790 19. Branda SS, Gonzalez-Pastor JE, Ben-Yehuda S, Losick R, Kolter R. 2001. Fruiting  
791 body formation by *Bacillus subtilis*. *Proc Natl Acad Sci USA* 98:11621-11626.
- 792 20. McLoon AL, Guttenplan SB, Kearns DB, Kolter R, Losick R. 2011. Tracing the  
793 domestication of a biofilm-forming bacterium. *J Bacteriol* 193:2027-2034.
- 794 21. Burbulys D, Trach KA, Hoch JA. 1991. Initiation of sporulation in *Bacillus subtilis* is  
795 controlled by a multicomponent phosphorelay. *Cell* 64:545-552.
- 796 22. Ireton K, Rudner DZ, Siranosian KJ, Grossman AD. 1993. Integration of multiple  
797 developmental signals in *Bacillus subtilis* through the Spo0A transcription factor.  
798 *Genes Dev* 7:283-294.
- 799 23. Kearns DB, Chu F, Branda SS, Kolter R, Losick R. 2005. A master regulator for  
800 biofilm formation by *Bacillus subtilis*. *Mol Microbiol* 55:739-749.
- 801 24. Newman JA, Rodrigues C, Lewis RJ. 2013. Molecular Basis of the Activity of SinR  
802 Protein, the Master Regulator of Biofilm Formation in *Bacillus subtilis*. *Journal of*  
803 *Biological Chemistry* 288:10766-10778.
- 804 25. Chai Y, Kolter R, Losick R. 2009. Paralogous antirepressors acting on the master  
805 regulator for biofilm formation in *Bacillus subtilis*. *Mol Microbiol* 74:876-887.
- 806 26. Chai Y, Norman T, Kolter R, Losick R. 2010. An epigenetic switch governing  
807 daughter cell separation in *Bacillus subtilis*. *Genes Dev* 24:754-765.
- 808 27. Miras M, Dubnau D. 2016. A DegU-P and DegQ-Dependent Regulatory Pathway for  
809 the K-state in *Bacillus subtilis*. *Frontiers in Microbiology* 7.
- 810 28. Lopez D, Vlamakis H, Kolter R. 2009. Generation of multiple cell types in *Bacillus*  
811 *subtilis*. *FEMS Microbiol Rev* 33:152-63.
- 812 29. Vlamakis H, Aguilar C, Losick R, Kolter R. 2008. Control of cell fate by the formation  
813 of an architecturally complex bacterial community. *Genes & development* 22:945-953.
- 814 30. Cozy LM, Phillips AM, Calvo RA, Bate AR, Hsueh Y-H, Bonneau R, Eichenberger P,  
815 Kearns DB. 2012. SlrA/SinR/SlrR inhibits motility gene expression upstream of a  
816 hypersensitive and hysteretic switch at the level of  $\sigma$ D in *Bacillus subtilis*. *Mol*  
817 *Microbiol* 83:1210-1228.
- 818 31. Diethmaier C, Pietack N, Gunka K, Wrede C, Lehnik-Habrink M, Herzberg C, Hübner  
819 S, Stülke J. 2011. A novel factor controlling bistability in *Bacillus subtilis*: the YmdB  
820 protein affects flagellin expression and biofilm formation. *J Bacteriol* 193:5997-6007.
- 821 32. Norman TM, Lord ND, Paulsson J, Losick R. 2013. Memory and modularity in cell-  
822 fate decision making. *Nature* 503:481-486.
- 823 33. Chai Y, Norman T, Kolter R, Losick R. 2011. Evidence that metabolism and  
824 chromosome copy number control mutually exclusive cell fates in *Bacillus subtilis*.

- 825 EMBO J 30:1402-13.
- 826 34. Molle V, Fujita M, Jensen ST, Eichenberger P, Gonzalez-Pastor JE, Liu JS, Losick R.  
827 2003. The Spo0A regulon of *Bacillus subtilis*. Mol Microbiol 50:1683-1701.
- 828 35. Chastanet A, Vitkup D, Yuan G-C, Norman TM, Liu JS, Losick RM. 2010. Broadly  
829 heterogeneous activation of the master regulator for sporulation in *Bacillus subtilis*.  
830 Proc Natl Acad Sci USA 107:8486-8491.
- 831 36. Zafra O, Lamprecht-Grandío M, de Figueras CG, González-Pastor JE. 2012.  
832 Extracellular DNA Release by Undomesticated *Bacillus subtilis* Is Regulated by Early  
833 Competence. PLOS ONE 7:e48716.
- 834 37. Hamoen LW, Venema G, Kuipers OP. 2003. Controlling competence in *Bacillus*  
835 *subtilis*: shared use of regulators. Microbiology 149:9-17.
- 836 38. Dubnau D. 1991. Genetic competence in *Bacillus subtilis*. Microbiological reviews  
837 55:395-424.
- 838 39. Maamar H, Dubnau D. 2005. Bistability in the *Bacillus subtilis* K-state (competence)  
839 system requires a positive feedback loop. Mol Microbiol 56:615-624.
- 840 40. Maamar H, Raj A, Dubnau D. 2007. Noise in gene expression determines cell fate in  
841 *Bacillus subtilis*. Science 317:526-529.
- 842 41. Kalamara M, Spacapan M, Mandic-Mulec I, Stanley-Wall NR. 2018. Social  
843 behaviours by *Bacillus subtilis*: quorum sensing, kin discrimination and beyond.  
844 Molecular Microbiology 110:863-878.
- 845 42. D'Souza C, Nakano MM, Zuber P. 1994. Identification of *comS*, a gene of the *srfA*  
846 operon that regulates the establishment of genetic competence in *Bacillus subtilis*.  
847 Proc Natl Acad Sci USA 91:9397-9401.
- 848 43. Turgay K, Hahn J, Burghoorn J, Dubnau D. 1998. Competence in *Bacillus subtilis* is  
849 controlled by regulated proteolysis of a transcription factor. The EMBO journal  
850 17:6730-6738.
- 851 44. van Sinderen D, Luttinger A, Kong L, Dubnau D, Venema G, Hamoen L. 1995. *comK*  
852 encodes the competence transcription factor, the key regulatory protein for  
853 competence development in *Bacillus subtilis*. Mol Microbiol 15:455-462.
- 854 45. Konkol MA, Blair KM, Kearns DB. 2013. Plasmid-Encoded *ComI* Inhibits  
855 Competence in the Ancestral 3610 Strain of *Bacillus subtilis*. J Bacteriol 195:4085-  
856 4093.
- 857 46. Jers C, Kobir A, Søndergaard EO, Jensen PR, Mijakovic I. 2011. *Bacillus subtilis*  
858 two-component system sensory kinase DegS is regulated by serine phosphorylation  
859 in its input domain. PloS one 6:e14653-e14653.
- 860 47. Branda SS, Chu F, Kearns DB, Losick R, Kolter R. 2006. A major protein component  
861 of the *Bacillus subtilis* biofilm matrix. Mol Microbiol 59:1229-1238.
- 862 48. Chung YS, Dubnau D. 1998. All Seven *comG* Open Reading Frames Are Required  
863 for DNA Binding during Transformation of Competent *Bacillus subtilis*. J Bacteriol  
864 180:41-45.



- 865 49. López D, Vlamakis H, Losick R, Kolter R. 2009. Paracrine signaling in a bacterium.  
866 Genes & development 23:1631-1638.
- 867 50. Hahn J, Tanner AW, Carabetta VJ, Cristea IM, Dubnau D. 2015. ComGA-RelA  
868 interaction and persistence in the *Bacillus subtilis* K-state. Mol Microbiol 97:454-471.
- 869 51. Chai Y, Chu F, Kolter R, Losick R. 2008. Bistability and biofilm formation in *Bacillus*  
870 *subtilis*. Mol Microbiol 67:254-263.
- 871 52. Chu F, Kearns DB, Branda SS, Kolter R, Losick R. 2006. Targets of the master  
872 regulator of biofilm formation in *Bacillus subtilis*. Mol Microbiol 59:1216-1228.
- 873 53. Lord ND, Norman TM, Yuan R, Bakshi S, Losick R, Paulsson J. 2019. Stochastic  
874 antagonism between two proteins governs a bacterial cell fate switch. Science  
875 366:116-120.
- 876 54. Berka RM, Hahn J, Albano M, Draskovic I, Persuh M, Cui X, Sloma A, Widner W,  
877 Dubnau D. 2002. Microarray analysis of the *Bacillus subtilis* K-state: genome-wide  
878 expression changes dependent on ComK. Mol Microbiol 43:1331-1345.
- 879 55. Habib C, Yu Y, Gozzi K, Ching C, Shemesh M, Chai Y. 2017. Characterization of the  
880 regulation of a plant polysaccharide utilization operon and its role in biofilm formation  
881 in *Bacillus subtilis*. PLOS ONE 12:e0179761.
- 882 56. Chai Y, Kolter R, Losick R. 2010. Reversal of an epigenetic switch governing cell  
883 chaining in *Bacillus subtilis* by protein instability. Mol Microbiol 78:218-29.
- 884 57. Hahn J, Maier B, Haijema BJ, Sheetz M, Dubnau D. 2005. Transformation proteins  
885 and DNA uptake localize to the cell poles in *Bacillus subtilis*. Cell 122:59-71.
- 886 58. Kidane D, Graumann PL. 2005. Intracellular Protein and DNA Dynamics in  
887 Competent *Bacillus subtilis* Cells. Cell 122:73-84.
- 888 59. Kearns DB, Losick R. 2005. Cell population heterogeneity during growth of *Bacillus*  
889 *subtilis*. Genes Dev 19:3083-3094.
- 890 60. Liu L, Nakano MM, Lee OH, Zuber P. 1996. Plasmid-amplified *comS* enhances  
891 genetic competence and suppresses *sinR* in *Bacillus subtilis*. J Bacteriol 178:5144-  
892 5152.
- 893 61. Lazazzera BA, Solomon JM, Grossman AD. 1997. An Exported Peptide Functions  
894 Intracellularly to Contribute to Cell Density Signaling in *Bacillus subtilis*. Cell 89:917-  
895 925.
- 896 62. Sambrook J, Russell DW. 2001. Molecular Cloning. A Laboratory Manual. . Cold  
897 Spring Harbor Laboratory Press, Cold Spring Harbor, NY, USA.
- 898 63. Gryczan TJ, Contente S, Dubnau D. 1978. Characterization of *Staphylococcus*  
899 *aureus* plasmids introduced by transformation into *Bacillus subtilis*. J Bacteriol  
900 134:318-29.
- 901 64. Yasbin RE, Young FE. 1974. Transduction in *Bacillus subtilis* by bacteriophage SPP1.  
902 J Virol 14:1343-8.
- 903 65. Gao T, Greenwich J, Li Y, Wang Q, Chai Y. 2015. The Bacterial Tyrosine Kinase

- 904 Activator TkmA Contributes to Biofilm Formation Largely Independently of the  
905 Cognate Kinase PtkA in *Bacillus subtilis*. J Bacteriol 197:3421-32.
- 906 66. Ducret A, Quardokus EM, Brun YV. 2016. MicrobeJ, a tool for high throughput  
907 bacterial cell detection and quantitative analysis. Nature Microbiology 1:16077.
- 908 67. Gozzi K, Ching C, Paruthiyil S, Zhao Y, Godoy-Carter V, Chai Y. 2017. *Bacillus*  
909 *subtilis* utilizes the DNA damage response to manage multicellular development. npj  
910 Biofilms and Microbiomes 3:8.
- 911 68. Youngman PJ, J.B. P, Losick RM. 1984. Construction of a cloning site near one end  
912 of Tn917 into which foreign DNA may be inserted without affecting transposition in  
913 *Bacillus subtilis* or expression of the transposon-borne *erm* gene. Plasmid 12:1-9.

914

915

## 916 **Figure Legends**

917 **Figure 1. A working model for cross-pathway regulation between competence**  
918 **and biofilm in *B. subtilis*.** Competence development initiates when the quorum-  
919 sensing (QS) peptide derived from ComX (ComX\*) is sensed by a membrane  
920 histidine kinase ComP (37). The response regulator ComA then activates a *srfAA-*  
921 *AD* operon and an embedded small gene *comS*; the latter encodes a positive  
922 regulator ComS for the competence activator ComK (42). ComK<sup>ON</sup> cells express late  
923 competence genes, which ultimately differentiate into competent cells ready for DNA  
924 uptake. Here we propose that ComK simultaneously and negatively regulates the  
925 biofilm pathway by repressing the key biofilm regulatory gene *sinI* (shown as 1). SinI  
926 antagonizes the biofilm master repressor SinR to derepress genes for the biofilm  
927 matrix production (*epsA-O*, *tapA*, etc). Negative regulation of *sinI* by ComK is  
928 expected to inhibit biofilm formation. SlrR is another antagonist of SinR and forms a  
929 double negative loop with SinR. Under biofilm inducing conditions, *sinI* is activated  
930 by the developmental master regulator Spo0A in response to sensory kinases (e.g.  
931 KinC) sensing various environmental signals. Here, we also propose that the biofilm  
932 regulator SlrR negatively regulates competence development through several  
933 distinct mechanisms. First, SlrR activates matrix production, which physically blocks  
934 sensing of the quorum-sensing peptide signal ComX\* (shown as 4)(49); second,  
935 SlrR-induced cell chaining may block DNA uptake since DNA uptake machinery was  
936 shown to be pole-localized (57, 58)(shown as 3); third, SlrR negatively regulates the  
937 *srfAA-AD* operon and *comS* (shown as 2). Red arrows and blue lines represent  
938 positive and negative regulation, respectively. ComX\*, a secreted QS peptide



939 derived from ComX. Surfactin induces matrix production by a paracrine signaling  
940 mechanism (49).

941

942 **Figure 2. *B. subtilis* environmental strains are strong biofilm producers but**

943 **poor in competence. (A)** The colony and pellicle biofilm phenotypes of 7

944 environmental strains of *B. subtilis* plus 168 and 3610. Scale bar in the picture of

945 colony, 2 mm; scale bar in the picture of pellicle, 5 mm. The scale bar in the picture

946 of colony is representative for all pictures of colonies, so as the scale bar in the

947 picture of pellicle. **(B)** Transformation efficiency of the 7 environment isolates of *B.*

948 *subtilis* plus 168 and 3610. Results are shown as percentage (%) of the number of

949 transformants relative to the total number of cells. Assays were performed in

950 triplicates. Each dot represents one technical replicate. Error bars represent

951 standard deviations.

952

953 **Figure 3. A small proportion of cells from the environmental strains express**

954 **the late competence gene *comGA*. (A)** Environmental strains harboring the late

955 competence gene reporter  $P_{comGA-gfp}$  were grown in the competence medium (MC)

956 to early stationary phase. Cells were harvested and observed under fluorescent

957 microscopy. The 168 and 3610 strains were included for comparison. Representative

958 images were shown here. Scale bars, 10  $\mu$ m. **(B)** The percentage of  $P_{comGA-gfp}$

959 expressing cells relative to the total number of cells in 7 different environmental

960 strains plus 168 and 3610. In each bar, three dots represent three individual data

961 points calculated from three different images comprising of about 600-800 cells in

962 total per sample. Error bars represent standard deviations.

963

964 **Figure 4. Matrix producers and competent cells are mutually exclusive in the**

965 **3610 biofilm. (A)** Fluorescent microscopic analyses of cells collected from a *B.*

966 *subtilis* 3610 pellicle biofilm bearing dual fluorescent reporters of  $P_{comGA-gfp}$  and

967  $P_{tapA-mKate2}$  (EH43). The activity of  $P_{tapA-mKate2}$  (cells in red) indicates expression

968 of the key biofilm matrix operon *tapA-sipW-tasA* while  $P_{comGA-gfp}$  reports a late

969 competence gene *comGA* (cells in green). More images are available in Supple. Fig

970 2. Scale bar, 10  $\mu$ m. Scale bar is representative to all images in the figure. **(B)** Flow

971 cytometry analyses of the above dual fluorescent reporter strain (EH43, indicated as

972 mKate2/GFP), two single reporter strains (QS34 for  $P_{comGA^-}gfp$  and EH41 for  $P_{tapA^-}$   
973  $mKate2$ , indicated as GFP and mKate2, respectively), and 3610 (as a gating control).  
974 Activities of  $P_{comGA^-}gfp$  and  $P_{tapA^-}mKate2$  were measured in the GFP (y-axis) and  
975 RFP (for mKate2, x-axis) filters, respectively. Numbers represent the percentage (%)  
976 of gated cells vs total cells in the corresponding quadrant. **(C)** The quadrant analyses  
977 of the flow cytometry results. The percentage indicates gated cells/total cells in  
978 corresponding quadrant. Each dot represents one biological replicate. Experiments  
979 were repeated three times. Error bars indicate standard deviations. [One dot  
980 representing the mKate2/GFP quadrant from the single reporter (EH41, shown as  
981 GFP) and one dot representing the mKate2/GFP quadrant from the double reporter  
982 (EH43, shown as mKate2/GFP) were omitted due to errors].

983

984 **Figure 5. *comK* negatively regulates key biofilm genes. (A)** Overexpression of  
985 *comK* impairs biofilm formation in *B. subtilis*. Phenotypes of the colony biofilms by  
986 the wild type (3610),  $\Delta comK$  (YC100), and the wild type strain harboring an IPTG-  
987 inducible copy of *comK* (YC142) on MSgg plates supplemented with 0, 2, or 10  $\mu$ M  
988 IPTG. Scale bar, 2 mm. The scale bar is representative for all pictures in this panel.  
989 **(B-D)** Wild type strains bearing both an IPTG inducible copy of *comK* and one of the  
990 three biofilm gene reporters,  $P_{epsA^-}lacZ$  **(B, YC160)**,  $P_{sinI^-}lacZ$  **(C, YC159)** and  $P_{sinR^-}$   
991  $lacZ$  **(D, YC177)**, were assayed for  $\beta$ -galactosidase activities. Cells were cultured in  
992 MSgg in shaking, in the absence ( $comK^0$ ) or presence ( $comK^{++}$ ) of 10  $\mu$ M IPTG to  
993 induce *comK*. Assays were done in triplicates. Error bars represent standard  
994 deviations. The *t*-test was applied for statistical analysis. \* indicates P value < 0.05,  
995 \*\* indicates P value < 0.005, and \*\*\* indicates P value < 0.0005. **(E)** Fluorescent  
996 microscopic analyses of the dual reporter strain ( $P_{comGA^-}gfp$  and  $P_{tapA^-}mKate2$ ) that  
997 also contains an IPTG inducible copy of *comK* (EH44). Cells were grown in shaking  
998 MSgg to log phase ( $OD_{600}=0.5$ ), split into three fractions, one without IPTG and the  
999 other two with either 50 or 100  $\mu$ M IPTG, and continued to grow for an hour before  
1000 harvested and analyzed under fluorescent microscopy. Scale bars, 10  $\mu$ m. **(F)**  
1001 Quantitative analyses of the dual reporter activities upon *comK* overexpression. For  
1002 each IPTG concentration (0, 50, or 100  $\mu$ M), individual dots represent results from 4  
1003 separate images (in one biological replicate) comprising of about 600-800 cells in  
1004 total. Error bars represent standard deviations. The *t*-test was applied for statistical

1005 analysis. \*\*\* indicates P value < 0.0005.

1006

1007 **Figure 6. ComK directly binds to the promoter of *sinI*.** (A) Shown is the DNA  
1008 sequence of the promoter region of *sinI*. The Spo0A~P activation site (in yellow and  
1009 underlined), the -10 and -35 motives (underlined), and putative ComK boxes (from  
1010 box 1 to 4) are highlighted (31). (B) Electrophoretic mobility shift assay (EMSA) of  
1011 His<sub>6</sub>-ComK binding to the promoter of *sinI*. P<sub>*sinI*</sub> was end-labeled with Cy3 dye and  
1012 used as the DNA probe. Cy3-labeled P<sub>*ganS*</sub> was used as a negative control. The far-  
1013 left lanes are the control of free DNA without proteins. A decreasing gradient of 150,  
1014 60, 15, and 7.5 nM of the recombinant His<sub>6</sub>-ComK was applied in the lanes in EMSA  
1015 as indicated. 200 pmol of fluorescent labelled DNA probe was applied in each lane.  
1016 (C) Site-directed mutagenesis of the ComK boxes in the *sinI* promoter is indicated.  
1017 Nucleotide changes in box 1 (mut1) and box 3 (mut2) are highlighted in red.  
1018 Changes in box 2 and box 4 are avoided due to their overlap with -10 and -35  
1019 promoter motives. (D) β-Galactosidase activities of the cells with an inducible *comK*  
1020 construct and bearing either wild type P<sub>*sinI*</sub>-*lacZ* or the reporter fusions with indicated  
1021 point mutations in the K-box (mut1, mut2, and mut1+2, as shown in C) were  
1022 performed. IPTG was added at 10 μM in the media. Cells were grown in shaking  
1023 MSgg. Samples were periodically collected and assayed for  
1024 β-galactosidase activities. Assays were performed at least in triplicates. Error bars  
1025 represent standard deviations.

1026

1027 **Figure 7. SlrR negatively regulates competence through three distinct**  
1028 **mechanisms.** (A) Comparison of the transformation efficiency of the wild type (3610)  
1029 and the Δ*epsH*Δ*tasA* double mutant (YC775). Results were presented as percentage  
1030 (%) of the number of transformants relative to the total number of cells. Experiment  
1031 was repeated three times. Each dot indicates one biological replicate. Error bars  
1032 indicate standard deviation. \* indicates P value < 0.05. (B) Comparison of the  
1033 transformation efficiency between the 7 environmental strains of *B. subtilis* and their  
1034 respective Δ*epsA*-O mutants (4). Strains 168, 3610 and the Δ*epsA*-O mutants of 168  
1035 and 3610 were also included. Results were shown as fold changes of the CFU  
1036 counts during transformation comparing the Δ*epsA*-O mutants and the respective  
1037 wild type strains. Each dot indicates one biological replicate. Error bars indicate  
1038 standard deviation. \* indicates P value < 0.05 and \*\*\* indicates P value < 0.0005. (C)

1039 The microscopic images of a *slrR* inducible strain (YC672). Cells were grown in  
1040 shaking LB without or with the addition of 100  $\mu$ M IPTG to induce *slrR* expression  
1041 and cell chaining phenotype. Red indicates cell membrane staining by the  
1042 membrane dye FM 4-64. Scale bars, 10  $\mu$ m. **(D)** Comparison of the transformation  
1043 efficiency of the *slrR* inducible strain (YC672) in the absence or presence of 100  $\mu$ M  
1044 IPTG. The transformation efficiency is shown as percentage of the number of  
1045 transformants vs the total number of cells. The experiment was repeated three times.  
1046 Each dot represents one biological replicate. Error bars indicate standard deviation. \*  
1047 indicates P value < 0.05. **(E)** Fluorescence microscopic analyses of the *slrR*  
1048 overexpression strain harboring a fluorescent reporter of  $P_{srfAA}$ -*gfp* (YC1270) in the  
1049 absence or presence of IPTG to induce *slrR* expression. Cells were grown in shaking  
1050 MSgg to early log phase ( $OD_{600}=0.3$ ), and split into two fractions, one without IPTG  
1051 (*slrR*<sup>0</sup>) and the other with 100  $\mu$ M IPTG (*slrR*<sup>++</sup>) added to induce *slrR* expression for  
1052 an hour before harvest and analysis of the cells. **(F)** Quantification of fluorescent  
1053 pixel density of the cells in **(E)** by ImageJ (with MicroJ plugin). More than 200 cells  
1054 from each sample were randomly picked for analysis. The results were plotted  
1055 indicating the difference in  $P_{srfAA}$ -*gfp* activity between without and with *slrR*  
1056 overexpression. The numbers 20.5 (*slrR*<sup>0</sup>) and 11.5 (*slrR*<sup>++</sup>) indicate average pixel  
1057 density (AU) of the top 50% of the cells in each population. **(G)** qPCR analyses to  
1058 test the negative regulation of SlrR on *srfAA-AD*. Total RNA was prepared from the  
1059 *slrR* inducible strain (YC672) grown with (*slrR*<sup>++</sup>) and without (*slrR*<sup>0</sup>) 100  $\mu$ M IPTG.  
1060 Three primer pairs, two for detection of *srfAA* and one for detection of *srfAB*, were  
1061 applied. Each experiment was repeated three times. Each dot indicates one  
1062 biological replicate. The error bars indicate standard deviation. \* indicates P values <  
1063 0.05. \*\* indicates P value < 0.005. **(H)** A schematic drawing of how the biofilm  
1064 regulator SlrR negatively impacts competence through three distinct mechanisms. In  
1065 Figure 7, the *t*-test was applied for statistical analysis.

1066  
1067

1068 **Table 1. Strains used in this study.**

| Strain                    | Genotype                                                                                                                                                                        | Reference  |
|---------------------------|---------------------------------------------------------------------------------------------------------------------------------------------------------------------------------|------------|
| <b><i>B. subtilis</i></b> |                                                                                                                                                                                 |            |
| PY79                      | SPβ-cured laboratory strain of <i>B. subtilis</i> as a host for transformation                                                                                                  | (68)       |
| 168                       | A laboratory strain of <i>B. subtilis</i> as a host for transformation                                                                                                          |            |
| NCIB3610                  | Undomesticated <i>B. subtilis</i> strain capable of biofilm formation                                                                                                           | (19)       |
| EH41                      | <i>sacA::P<sub>tapA</sub>-mKate2</i> in 3610, kan <sup>R</sup>                                                                                                                  | This study |
| EH43                      | A dual fluorescent reporter strain of <i>sacA::P<sub>tapA</sub>-mKate2</i> and <i>amyE::P<sub>comGA</sub>-gfp</i> in 3610, km <sup>R</sup> , cm <sup>R</sup>                    | This study |
| EH44                      | <i>sacA::P<sub>tapA</sub>-mKate2</i> , <i>amyE::P<sub>comGA</sub>-gfp</i> , <i>thrC::P<sub>hpspank</sub>-comK</i> in 3610, km <sup>R</sup> , cm <sup>R</sup> , erm <sup>R</sup> | This study |
| RL4169                    | $\Delta sigD::tet$ in 3610, tet <sup>R</sup>                                                                                                                                    | (59)       |
| YC100                     | $\Delta comK::kan$ in 3610, km <sup>R</sup>                                                                                                                                     | This study |
| YC108                     | <i>amyE::P<sub>sinR</sub>-lacZ</i> in 3610, cm <sup>R</sup>                                                                                                                     | (51)       |
| YC110                     | <i>amyE::P<sub>sinl(WT)</sub>-lacZ</i> in 3610, cm <sup>R</sup>                                                                                                                 | (51)       |
| YC130                     | <i>amyE::P<sub>epsA</sub>-lacZ</i> in 3610, cm <sup>R</sup>                                                                                                                     | (51)       |
| YC157                     | <i>amyE::P<sub>hpspank</sub>-comK</i> in 3610, spec <sup>R</sup>                                                                                                                | This study |
| YC159                     | <i>thrC::P<sub>hpspank</sub>-comK</i> and <i>amyE::P<sub>sinl</sub>-lacZ</i> in 3610, erm <sup>R</sup> , cm <sup>R</sup>                                                        | This study |
| YC160                     | <i>thrC::P<sub>hpspank</sub>-comK</i> and <i>amyE::P<sub>epsA</sub>-lacZ</i> in 3610, erm <sup>R</sup> , cm <sup>R</sup>                                                        | This study |
| YC177                     | <i>thrC::P<sub>hpspank</sub>-comK</i> and <i>amyE::P<sub>sinR</sub>-lacZ</i> in 3610, erm <sup>R</sup> , cm <sup>R</sup>                                                        | This study |
| YC672                     | $\Delta slrR::tet$ , <i>amyE::P<sub>hpspank</sub>-slrR</i> , in 3610, tet <sup>R</sup> , spec <sup>R</sup>                                                                      | (26)       |
| YC775                     | $\Delta epsH::tet$ and $\Delta tasA::spec$ in 3610, tet <sup>R</sup> , spec <sup>R</sup>                                                                                        | This study |
| YC1270                    | <i>amyE::P<sub>hpspank</sub>-slrR</i> , <i>lacA::P<sub>srfAA</sub>-gfp</i> in 3610, spec <sup>R</sup> , erm <sup>R</sup>                                                        | This study |
| QS34                      | <i>amyE::P<sub>comGA</sub>-gfp</i> in 3610, cm <sup>R</sup>                                                                                                                     | This study |
| QS35                      | <i>thrC::P<sub>spank</sub>-comK</i> , <i>amyE::P<sub>sinl(WT)</sub>-lacZ</i> in 3610, mls <sup>R</sup> , cm <sup>R</sup>                                                        | This study |
| QS36                      | <i>thrC::P<sub>spank</sub>-comK</i> , <i>amyE::P<sub>sinl(mut1)</sub>-lacZ</i> in 3610, mls <sup>R</sup> , cm <sup>R</sup>                                                      | This study |
| QS37                      | <i>thrC::P<sub>spank</sub>-comK</i> , <i>amyE::P<sub>sinl(mut2)</sub>-lacZ</i> in 3610, mls <sup>R</sup> , cm <sup>R</sup>                                                      | This study |
| QS38                      | <i>thrC::P<sub>spank</sub>-comK</i> , <i>amyE::P<sub>sinl(mut1+2)</sub>-lacZ</i> in 3610, mls <sup>R</sup> , cm <sup>R</sup>                                                    | This study |
| QS42                      | $\Delta degQ::spec$ in Ze90, spec <sup>R</sup>                                                                                                                                  | This study |
| QS43                      | $\Delta degQ::spec$ in HS1-1, spec <sup>R</sup>                                                                                                                                 | This study |
| QS44                      | $\Delta degQ::spec$ in CY35, spec <sup>R</sup>                                                                                                                                  | This study |
| QS45                      | $\Delta degQ::spec$ in CY54, spec <sup>R</sup>                                                                                                                                  | This study |
| QS46                      | $\Delta degQ::spec$ in W13-3, spec <sup>R</sup>                                                                                                                                 | This study |
| QS47                      | $\Delta degQ::spec$ in W14-2, spec <sup>R</sup>                                                                                                                                 | This study |
| QS48                      | $\Delta degQ::spec$ in H23-4, spec <sup>R</sup>                                                                                                                                 | This study |
| CY35                      | An environmental isolate of <i>B. subtilis</i>                                                                                                                                  | (4)        |
| CY54                      | An environmental isolate of <i>B. subtilis</i>                                                                                                                                  | (4)        |
| H23-4                     | An environmental isolate of <i>B. subtilis</i>                                                                                                                                  | (4)        |
| HS1-1                     | An environmental isolate of <i>B. subtilis</i>                                                                                                                                  | (4)        |
| W13-3                     | An environmental isolate of <i>B. subtilis</i>                                                                                                                                  | (4)        |
| W14-2                     | An environmental isolate of <i>B. subtilis</i>                                                                                                                                  | (4)        |
| Ze90                      | An environmental isolate of <i>B. subtilis</i>                                                                                                                                  | (4)        |
| CY94                      | $\Delta degU$ in 3610, tet <sup>R</sup>                                                                                                                                         | This study |
| CY96                      | $\Delta degS$ in 3610, tet <sup>R</sup>                                                                                                                                         | This study |
| CY601                     | $\Delta degQ::spec$ in 3610, spec <sup>R</sup>                                                                                                                                  | This study |
| CY602                     | <i>degQ</i> overexpression in 3610, spec <sup>R</sup>                                                                                                                           | This study |
| <b><i>E. coli</i></b>     |                                                                                                                                                                                 |            |
| DH5α                      | An <i>E. coli</i> host for molecular cloning                                                                                                                                    | Invitrogen |
| QS16                      | <i>E. coli</i> BL21/DE3 with the plasmid pQS06                                                                                                                                  | This study |
| <b>Plasmids</b>           |                                                                                                                                                                                 |            |
| pYC119                    | <i>amyE::P<sub>hpspank</sub>-comK</i> in pDR111, amp <sup>R</sup> , spec <sup>R</sup>                                                                                           | This study |
| pYC121                    | <i>amyE::gfp</i> (promoterless) in pDG1662, amp <sup>R</sup> , sm <sup>R</sup>                                                                                                  | (51)       |
| pYC128                    | <i>thrC::P<sub>hpspank</sub>-comK</i> in pDG1664, amp <sup>R</sup> , erm <sup>R</sup>                                                                                           | This study |
| pYC166                    | <i>amyE::P<sub>sinl</sub>-lacZ</i> in pDG268, amp <sup>R</sup> , cm <sup>R</sup>                                                                                                | (33)       |
| pQS06                     | pET28a(P <sub>T7</sub> - <i>his6-comK</i> ) plasmid, kan <sup>R</sup>                                                                                                           | This study |

1069 **Table 2. Oligonucleotides used in this study.**

| primer                   | sequence (5'-3')                              |
|--------------------------|-----------------------------------------------|
| comK-F1                  | gactaagcttaaggatggaggccataatatg               |
| comK-R1                  | gactgctagcctaataaccggttccccgagctc             |
| PcomK-F1                 | gtccatatgagtcagaaaaacagacgca                  |
| PcomK-R1                 | gtcaagctttctaataaccggttccccgag                |
| PsinI <sub>Mut1</sub> -F | acttttttaccattcgacagtggttctcgtttttttgagaa     |
| PsinI <sub>Mut1</sub> -R | ttctcaaaaaaaaaacgagaaacactggtcgaatggtaaaaaagt |
| PsinI <sub>Mut2</sub> -F | tcgtttttttgagtcgatacgcattataataa              |
| PsinI <sub>Mut2</sub> -R | ttattataatcgatatcgactcaaaaaaaaaacga           |
| PsinI-F                  | agaaaaacaggcgctgaaaa                          |
| PsinI-R                  | cagtccggccatgacttatt                          |
| PsinI-F4                 | gtcagaattctttcactgacgtctca                    |
| PsinI-R4                 | gtcaaagcttctcctcctaaaatactt                   |
| PganS-F                  | gtacgaattccggacccgattgcagtgggctg              |
| PganS-R                  | gtacggatccttcggtaggaatgaaagcgct               |
| PcomGA-F1                | gtacgaattctcttgaaaatgaccaaatacggg             |
| PcomGA-R1                | sgtacaagcttcaacgcatattgtagaaaaagaagaaaagg     |
| PdegQ-F                  | tcggtagaacgaaaaaaaaagacttg                    |
| PdegQ-R                  | aaacgctctttcgcatagaaagata                     |
| srfAA1F                  | ctttttaccctttaacggatgcaca                     |
| srfAA1R                  | gttttcatctagccgcaaccgaagg                     |
| srfAA2F                  | tttacgcaaagtgtcatcacgtgat                     |
| srfAA2R                  | ttcttttgtctctgagccgctggct                     |
| srfAB1F                  | cacaattagagcttgggattcacggc                    |
| SrfAB1R                  | ctgatgcacaaataaccgtacggaga                    |

1070

1071



1072 **Supplemental Figure Legends**

1073 **Supple. Figure 1. DegQ impacts competence negatively in some, but not all,**

1074 **environmental strains. (A)** Transformation efficiency of WT,  $\Delta degQ$ ,  $degQ$

1075 overexpression,  $\Delta degS$ , and  $\Delta degU$  mutants of *B. subtilis* 3610. Results were shown

1076 as percentage of the number of transformants vs the number of total cells. Assays

1077 were done in triplicates. Error bars represent standard deviations. \* indicates P value

1078 < 0.05. The *t*-test was applied for statistical analysis. **(B)** Comparison of

1079 transformation efficiency between the  $\Delta degQ$  deletion mutants and the respective

1080 wild type environmental strains. Numbers in the y-axis represent fold changes

1081 comparing CFU counts of the  $\Delta degQ$  deletion mutants and those of the respective

1082 wild type strains. Assays were done in triplicates. Error bars represent standard

1083 deviations. **(C)** DNA sequence alignments of the  $degQ$  promoter region from 7

1084 environmental strains plus 168 and 3610. Newly identified nucleotide changes in

1085 environmental strains, which correspond to the -28, -48, and -77 positions relative to

1086 the  $degQ$  transcription start, are highlighted in red boxes. The previously identified

1087 single nucleotide change in 168 is highlighted in the blue box.

1088

1089 **Supple. Figure 2. Matrix producers and competent cells are mutually exclusive**

1090 **in the 3610 biofilm.** Fluorescent microscopic analyses of cells collected from a *B.*

1091 *subtilis* 3610 pellicle biofilm bearing dual fluorescent reporters of  $P_{comGA}$ -*gfp* and

1092  $P_{tapA}$ -*mKate2* (EH43). In the above overlay images, the activity of  $P_{tapA}$ -*mKate2* (cells

1093 in red) indicates expression of the key biofilm matrix operon *tapA-sipW-tasA* while

1094  $P_{comGA}$ -*gfp* reports a late competence gene *comGA* (cells in green). Scale bar, 10  $\mu$ m.

1095 Scale bar is representative to all images in the figure.

1096

1097 **Supplemental Figure 3. (A) Mild overexpression of *comK* does not cause**

1098 **growth inhibition.** The wild type strain harboring an IPTG-inducible copy of *comK*

1099 (YC142) was inoculated in MSgg broth and grown at 37°C over a period of 10 hours.

1100 IPTG was either not added ( $comK^0$ ) or added to the medium at the final

1101 concentration of 10  $\mu$ M to induce mild *comK* overexpression ( $comK^{++}$ ). Cell were

1102 periodically collected and cell optical density (O.D.<sub>600</sub>) was measured. (B)

1103 Comparison of transformation efficiency between the *epsA-O* mutants of the

1104 environmental strains and their respective wild type strains. Results were presented



1105 in log scale as percentage of the number of transformants vs the number of total  
1106 cells. Experiment was done in triplicates. Error bars represent standard deviations. \*  
1107 indicates P value < 0.05; \*\*\* indicates P value < 0.0005. The *t*-test was applied for  
1108 statistical analysis.

1109

1110 **Supplemental Figure 4.  $\Delta sigD$  cells form long chains and demonstrate very**  
1111 **low transformation efficiency. (A)** The microscopic images of the wild type (3610)  
1112 cells and the  $\Delta sigD$  mutant (RL4169), known to form long cell chains due to lack of  
1113 SigD-controlled autolysin activities. Red indicates cell membrane staining by the  
1114 membrane dye FM 4-64. Scale bar, 10  $\mu$ m. Scale bar applies to both images here.  
1115 **(B)** Comparison of transformation efficiency of the wild type (3610) and the  $\Delta sigD$   
1116 mutant (RL4169). The  $\Delta comK$  mutant (YC100) is known to be deficient in  
1117 transformation and used as a negative control in the experiment. Assays were done  
1118 in triplicates. Error bars represent standard deviations. The *t*-test was applied for  
1119 statistical analysis. \*\* indicates P value < 0.005.

1120

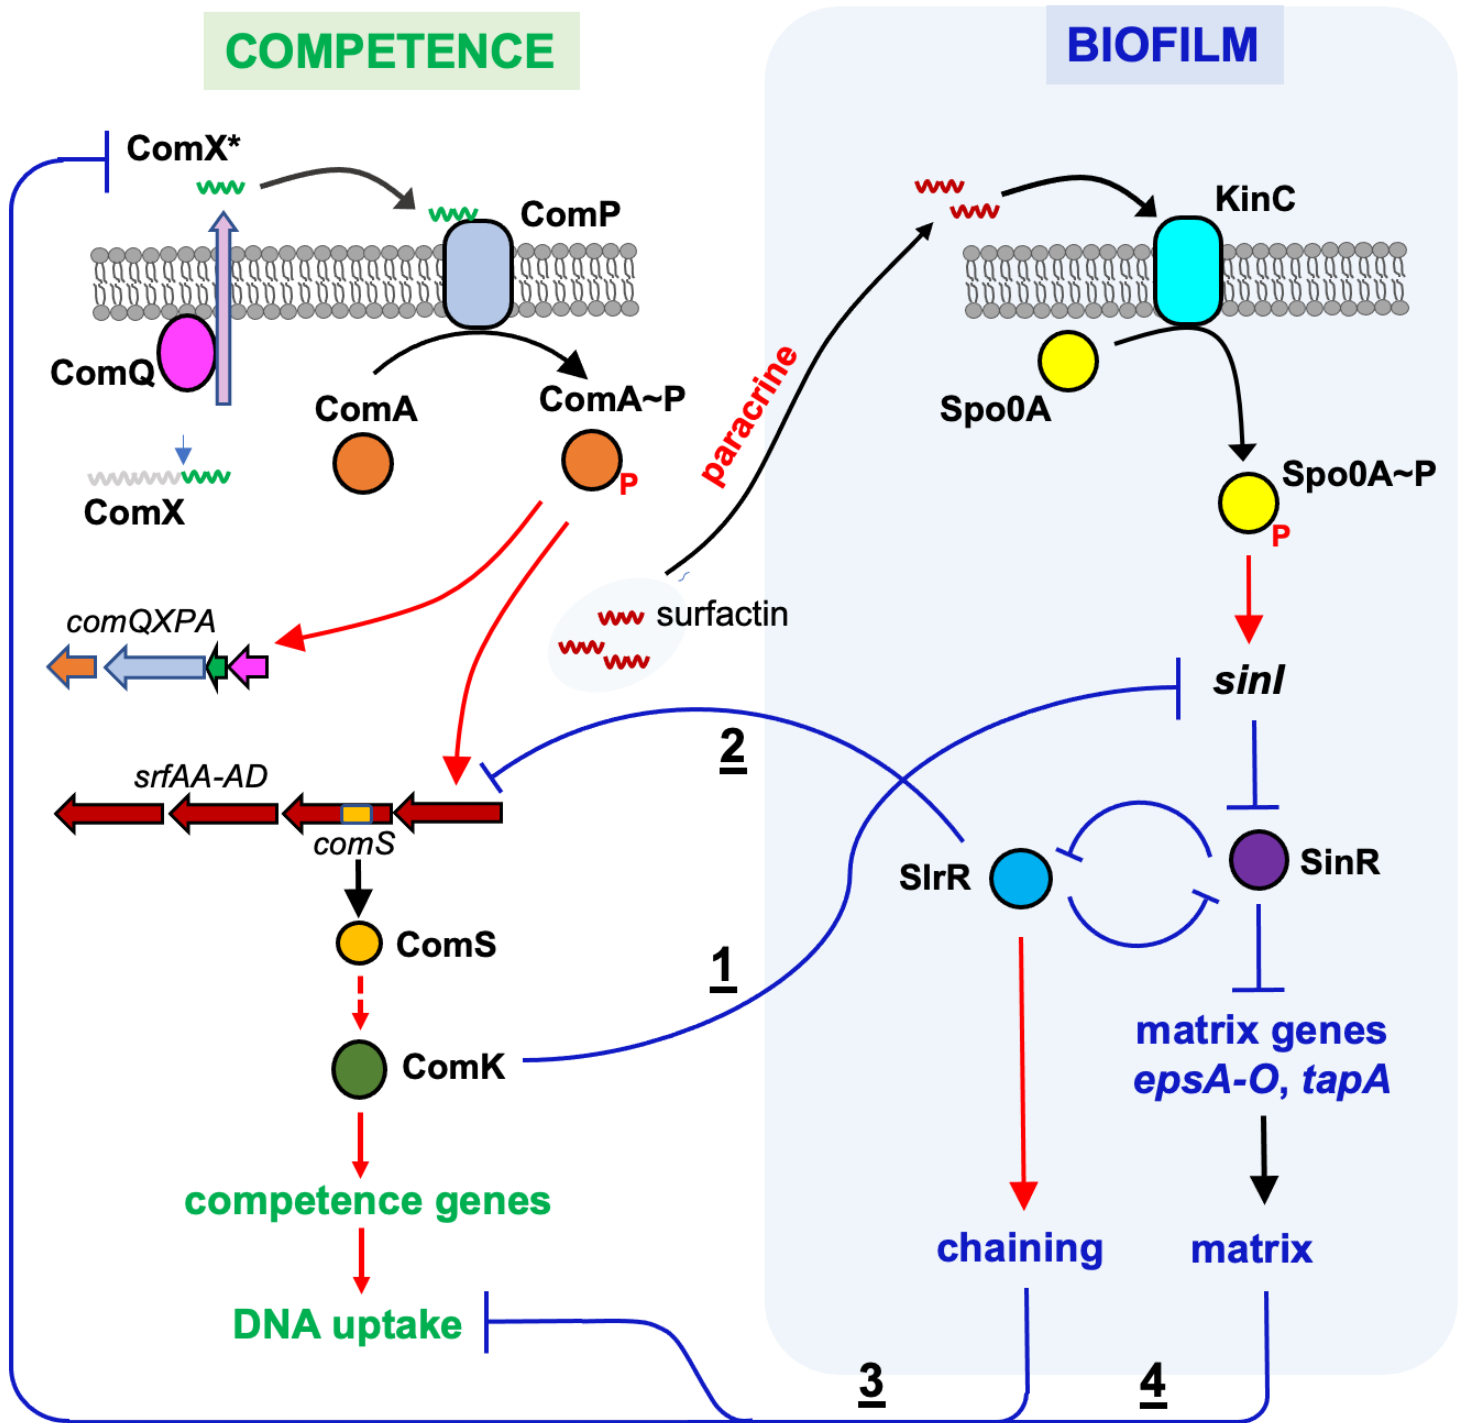

Figure 1

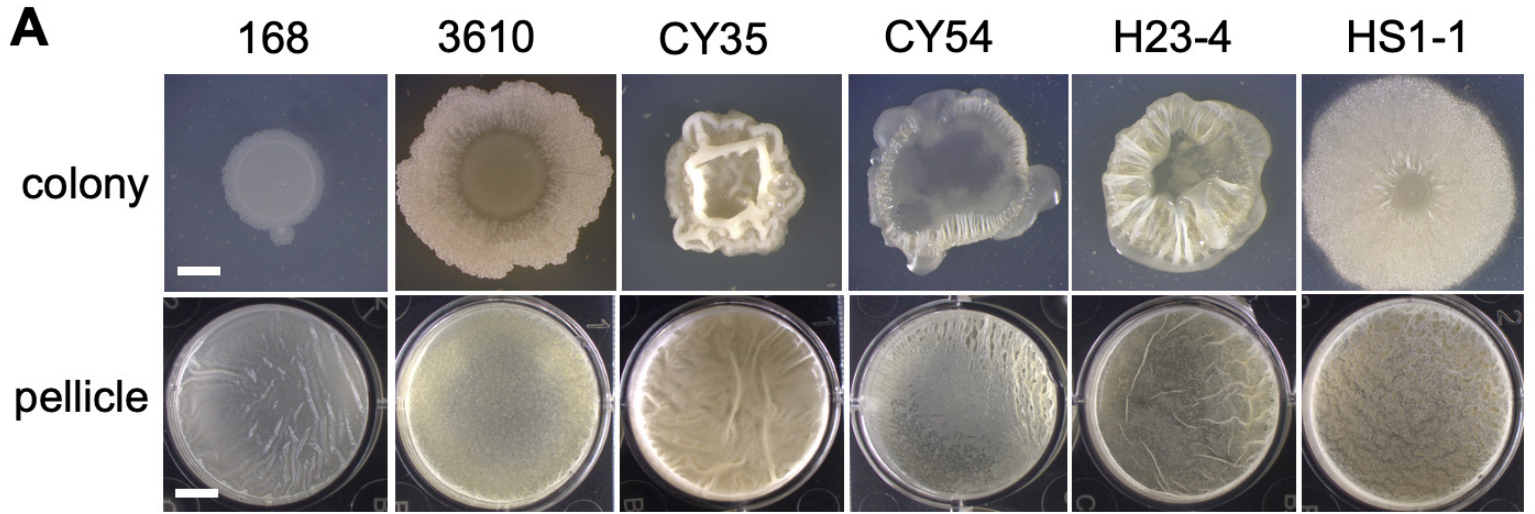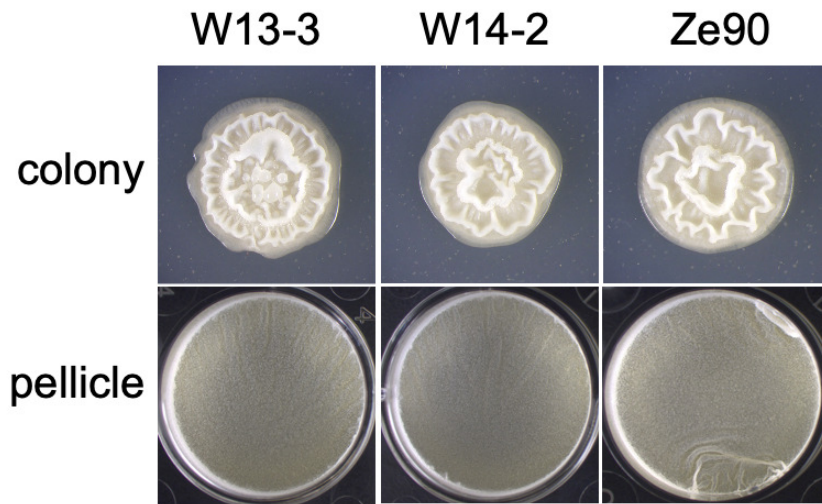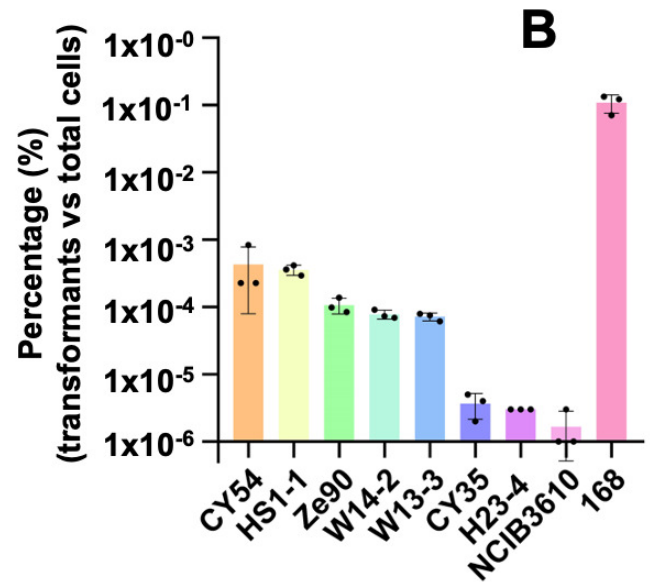

**Figure 2**

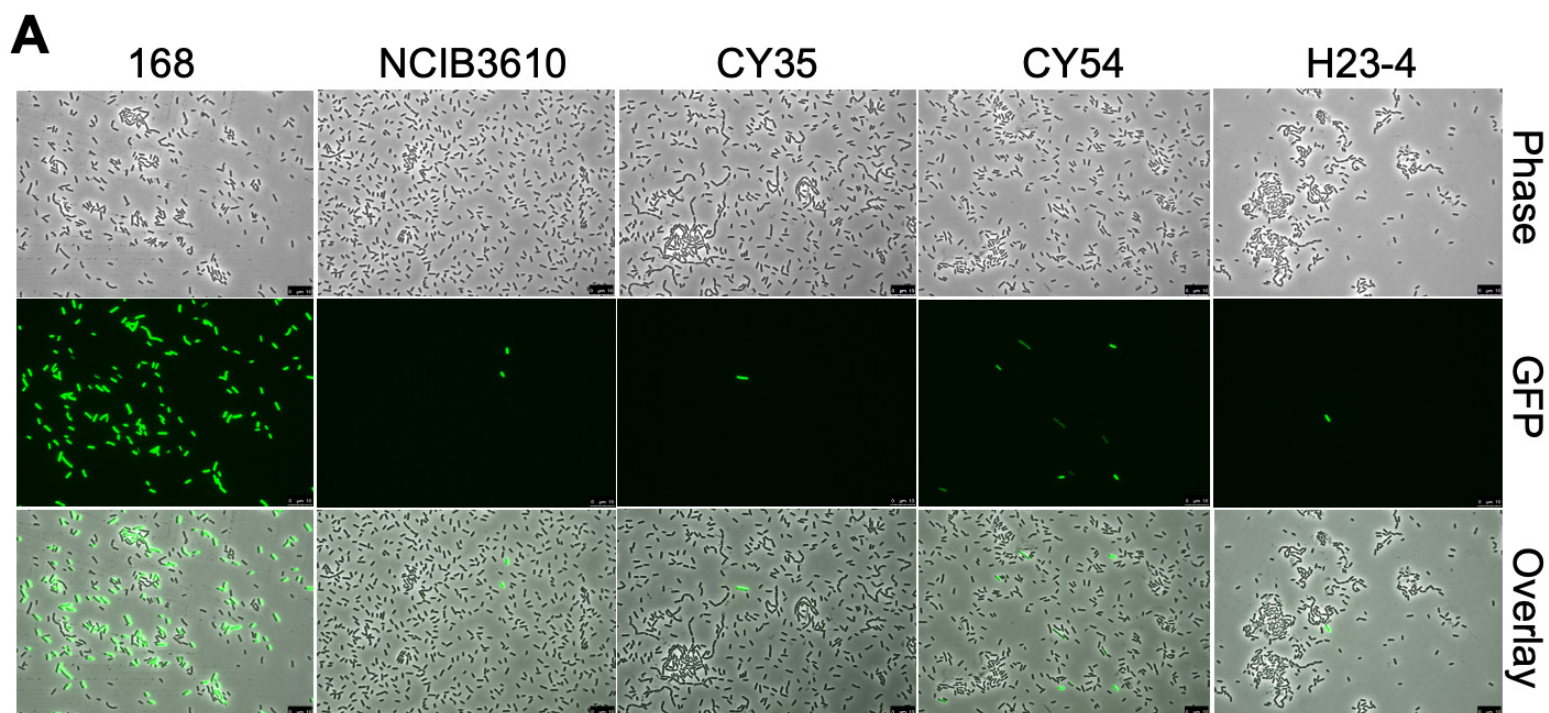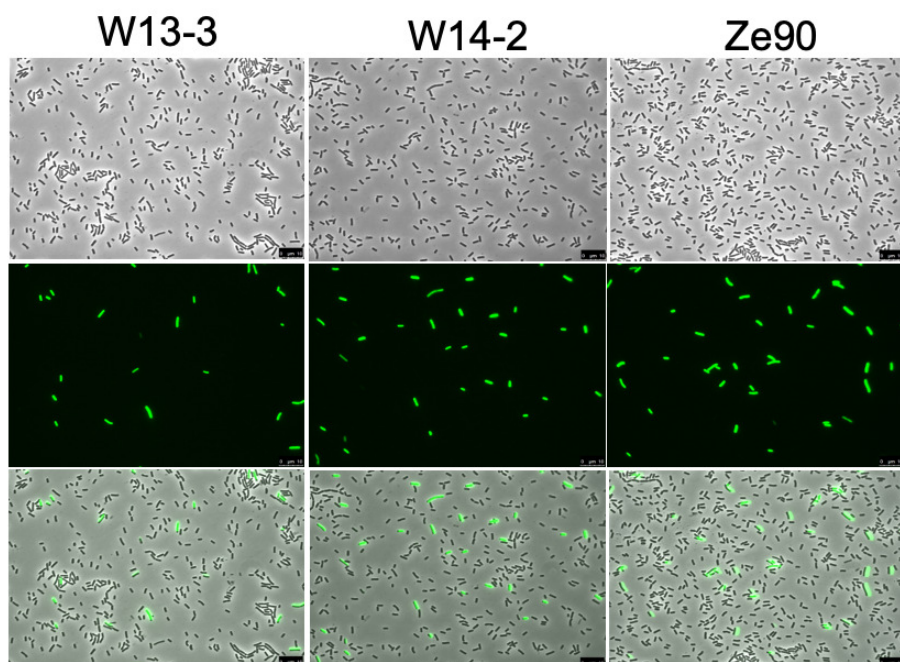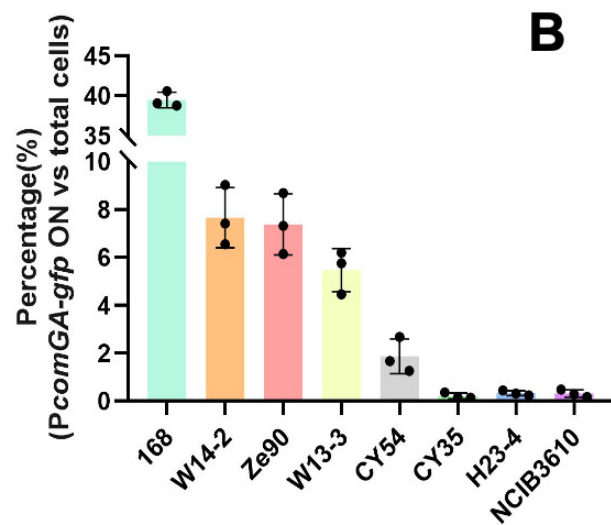

**Figure 3**



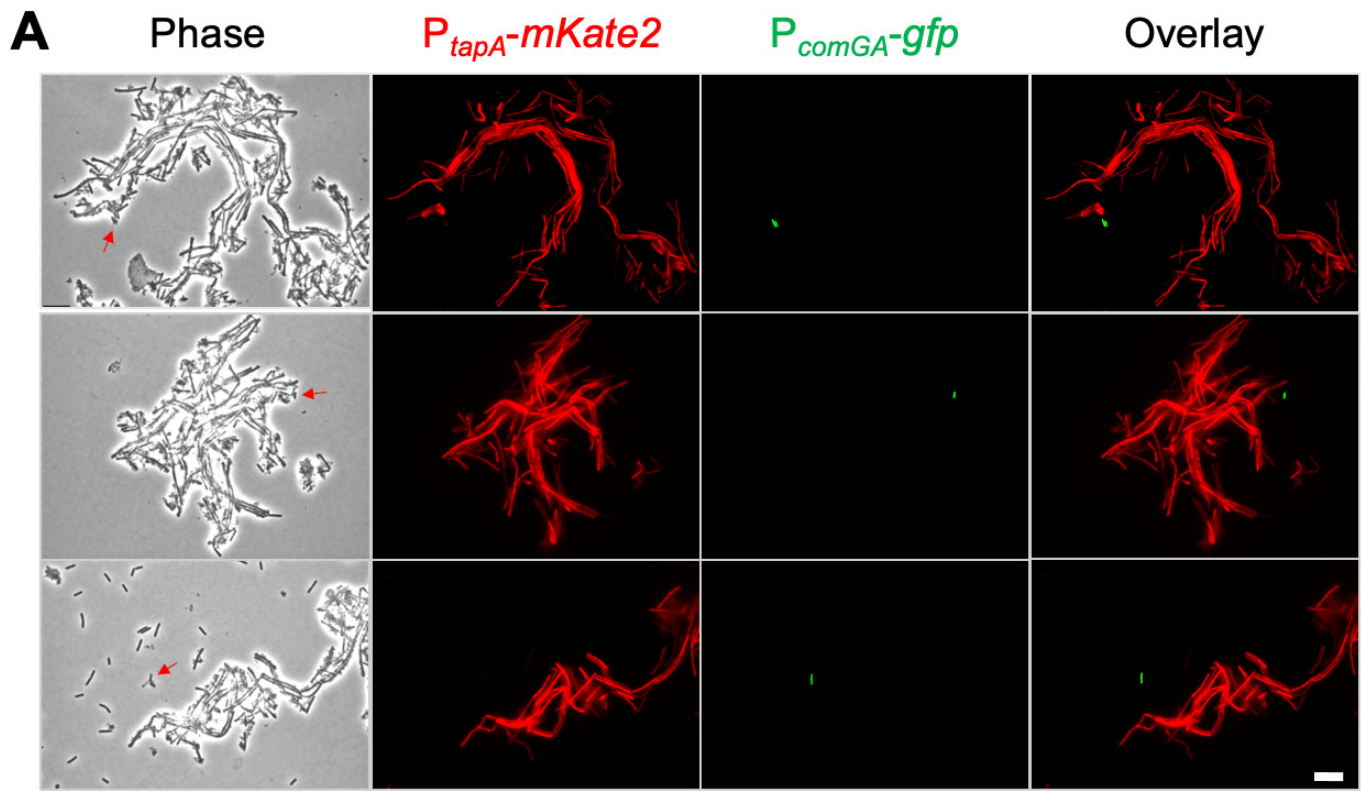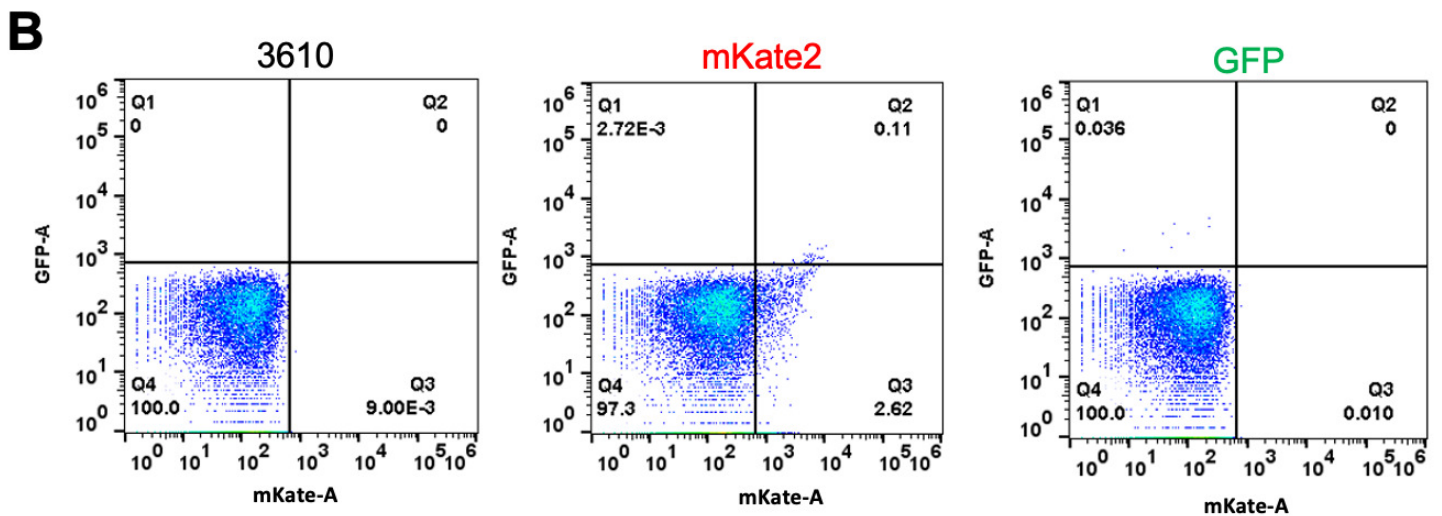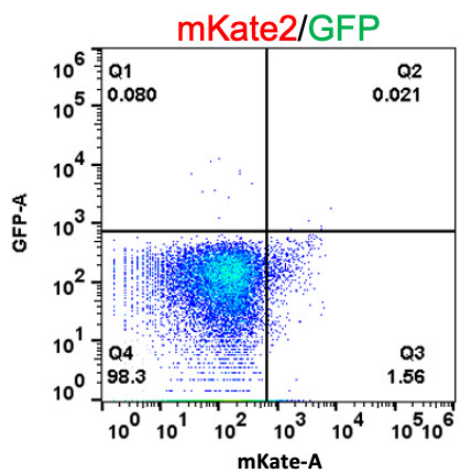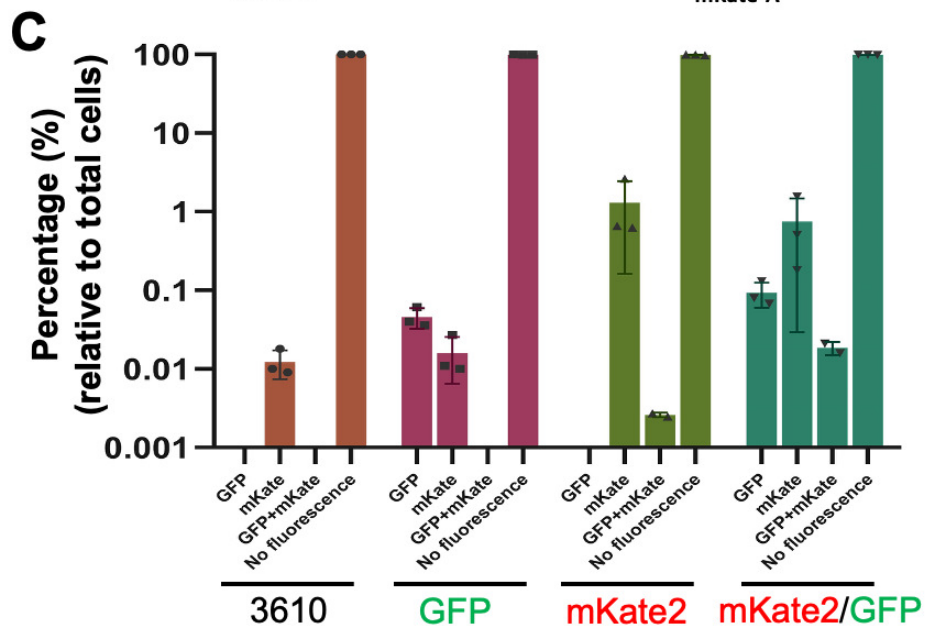

**Figure 4**

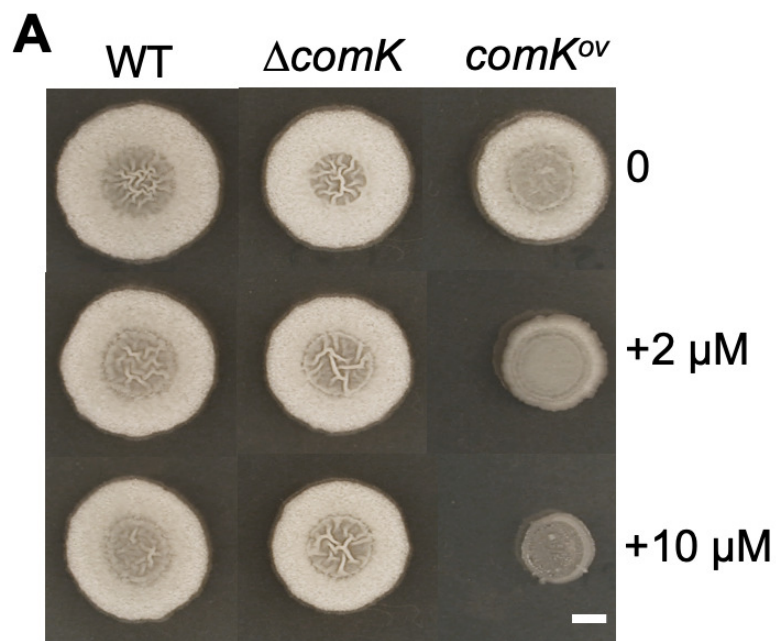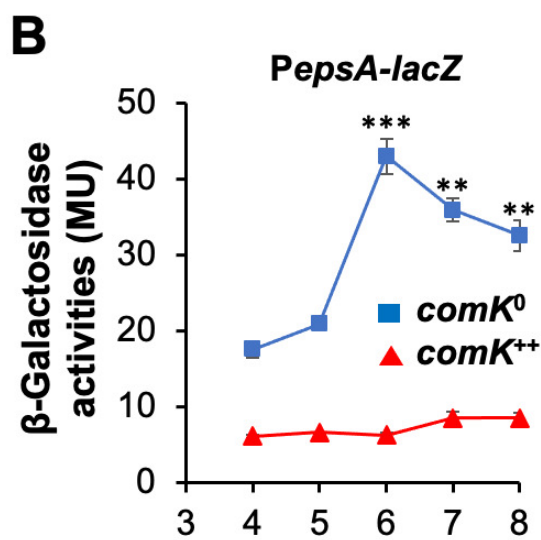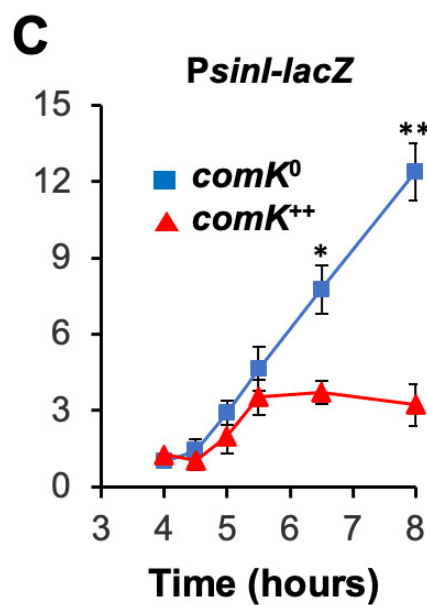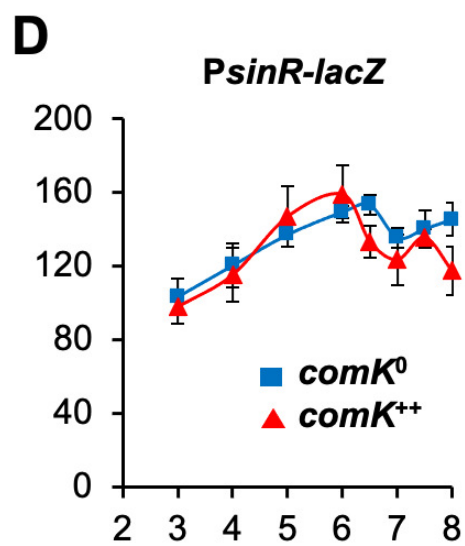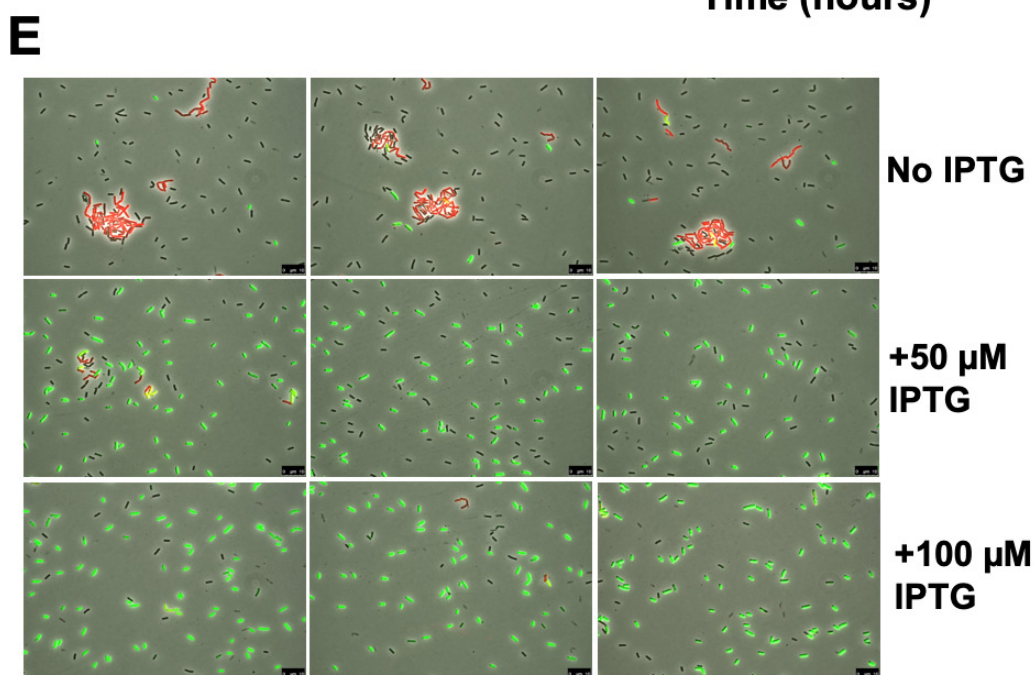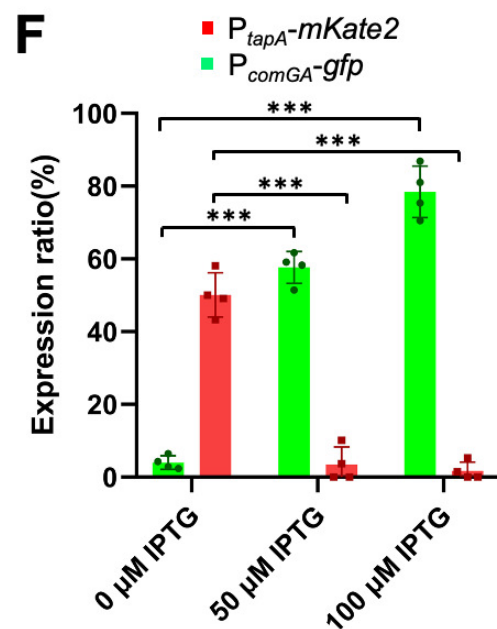

**Figure 5**



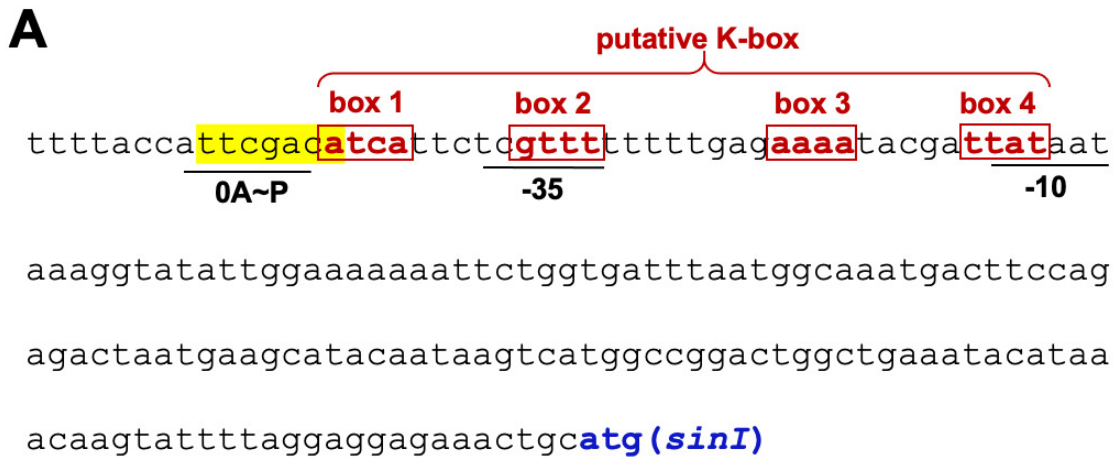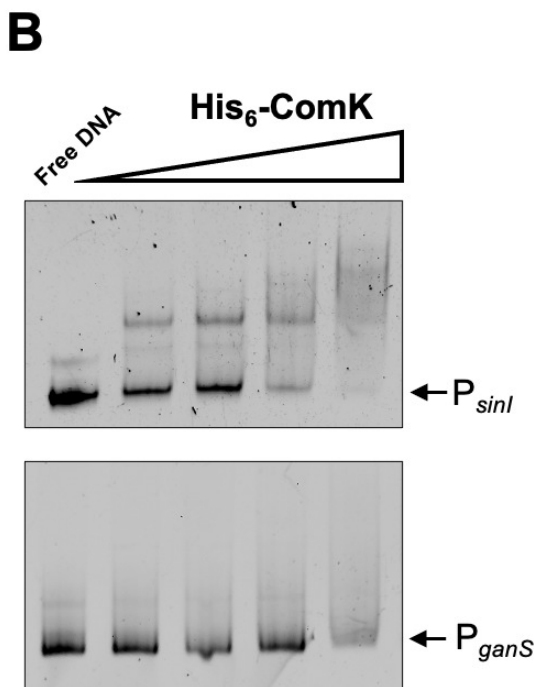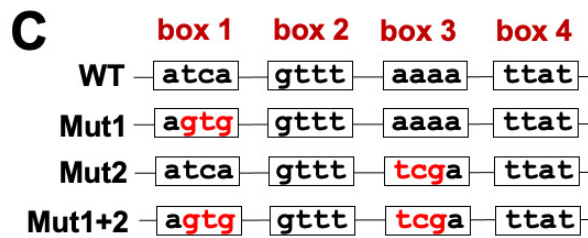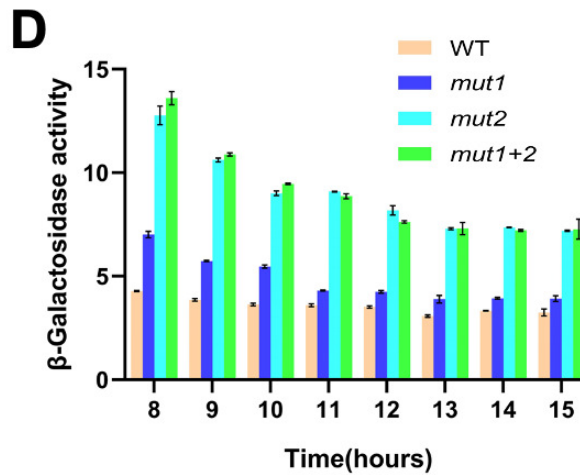

**Figure 6**

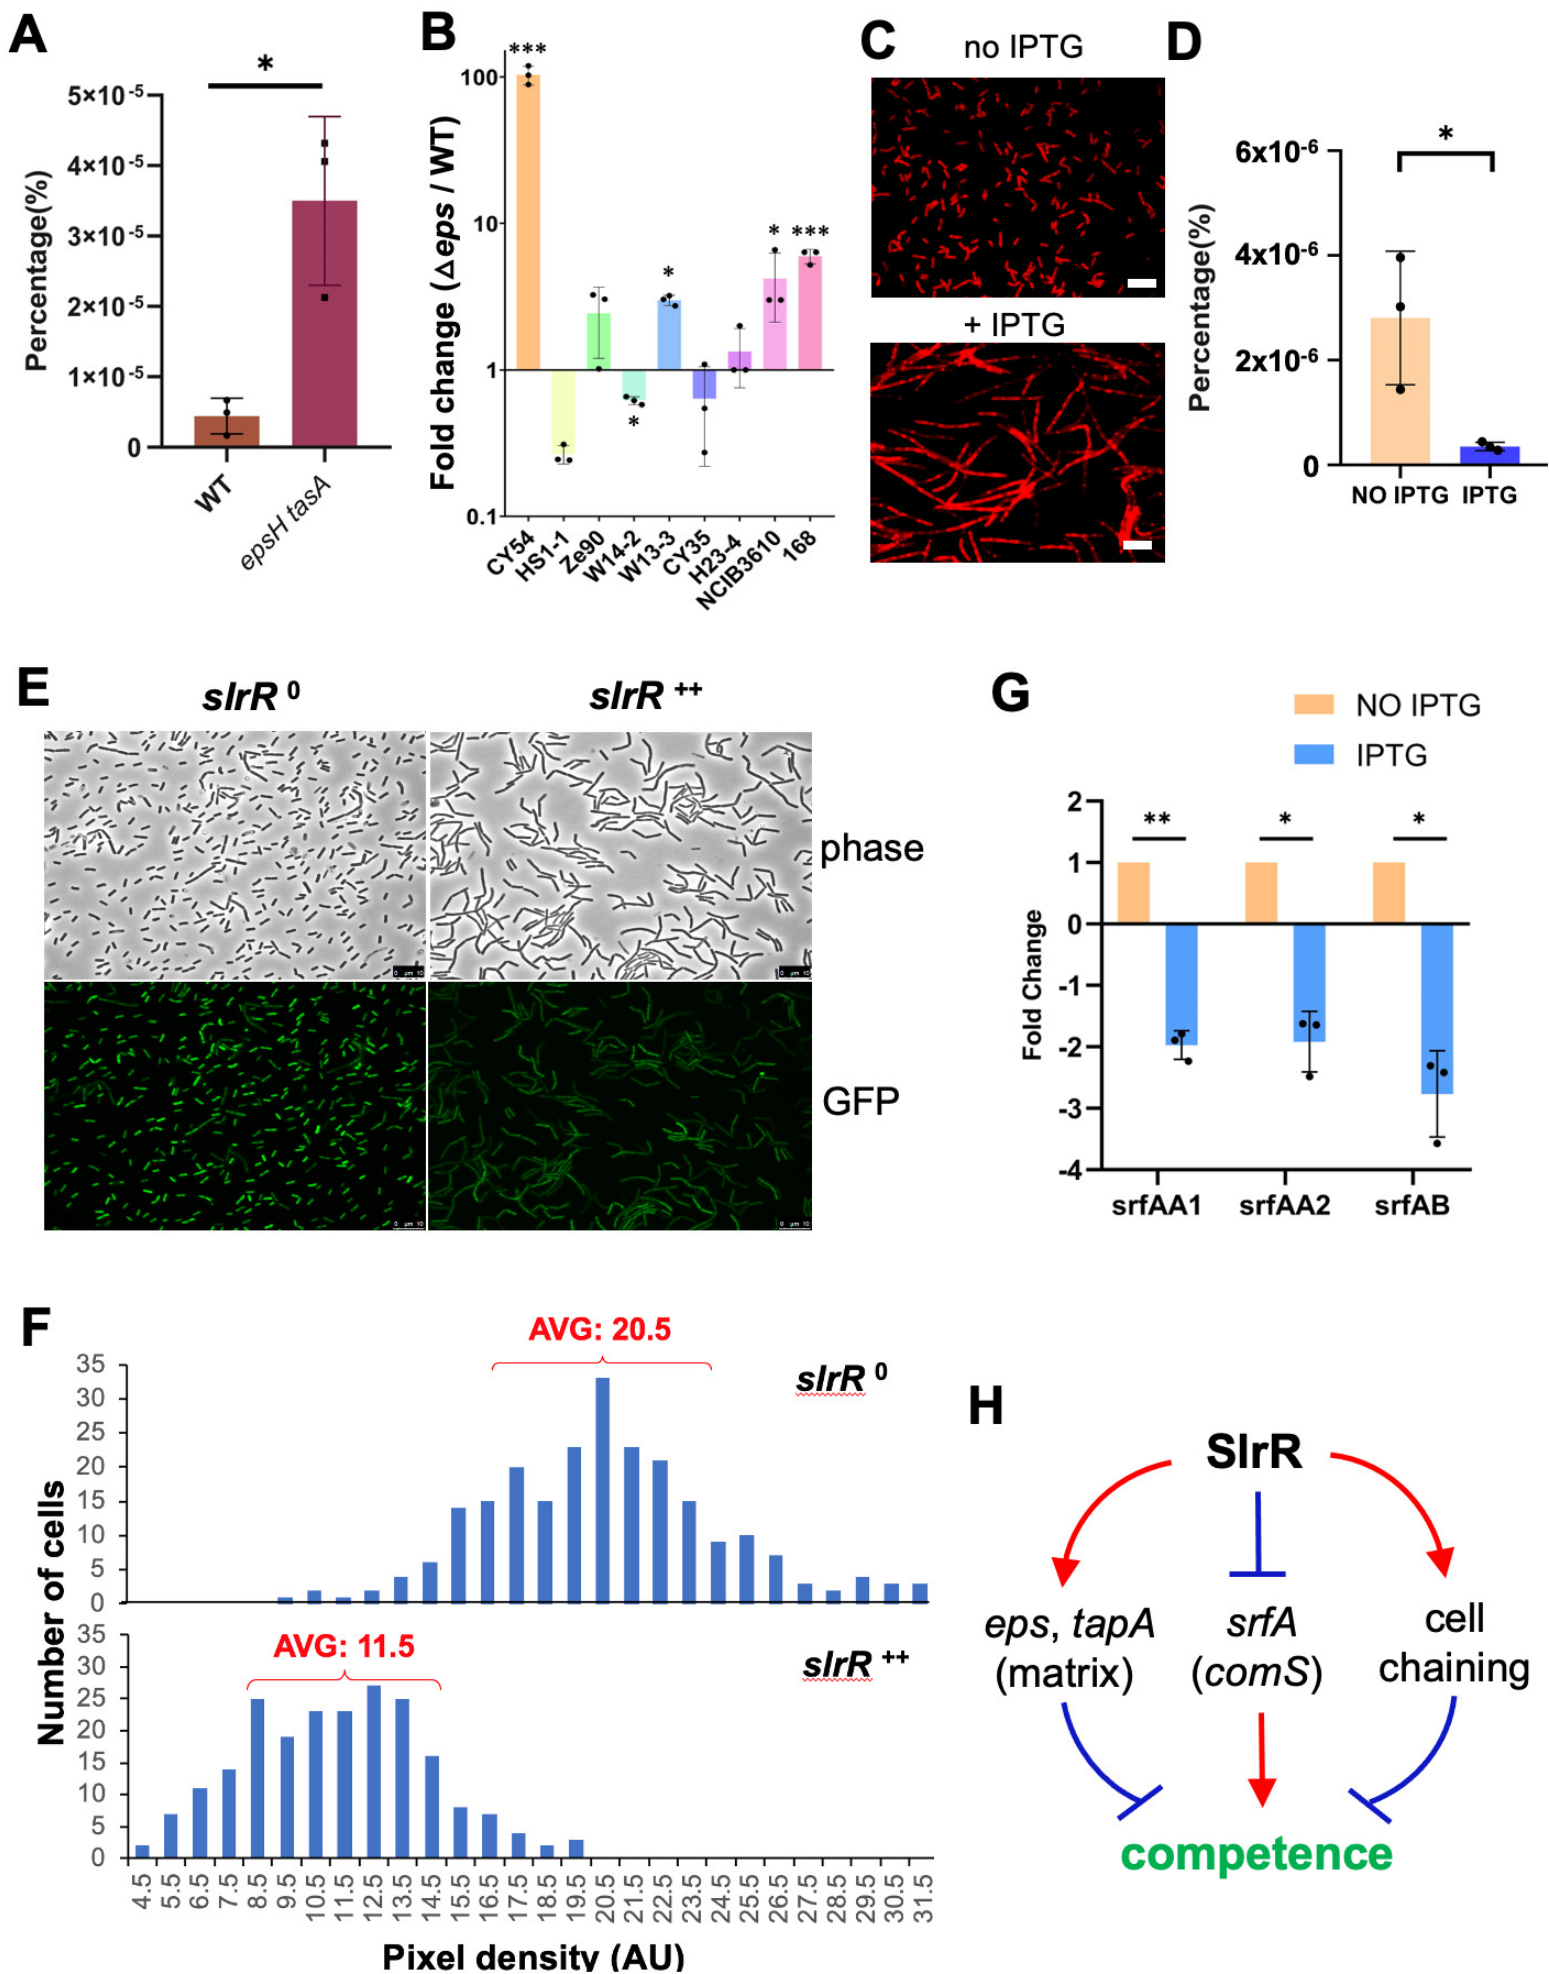

Figure 7
